1 **Non-canonical Telomerase Reverse Transcriptase Controls Osteogenic Differentiation of**  
2 **Aortic Valve Cells Through STAT5**

3

4 Rolando A. Cuevas<sup>1</sup>, Luis Hortells<sup>1,2</sup>, Claire C. Chu<sup>1</sup>, Ryan Wong<sup>1</sup>, Alex Crane<sup>1</sup>, Camille  
5 Boufford<sup>1</sup>, Cailyn Regan<sup>1</sup>, William J. Moorhead III<sup>1</sup>, Michael J. Bashline<sup>1</sup>, Aneesha Parwal<sup>1</sup>,  
6 Angelina M. Parise<sup>1</sup>, Aditi Gurkar<sup>3</sup>, Dennis Bruemmer<sup>4</sup>, John Sembrat<sup>5</sup>, Ibrahim Sultan<sup>6</sup>,  
7 Thomas G. Gleason<sup>7</sup>, Marie Billaud<sup>8</sup>, and Cynthia St. Hilaire<sup>1,9\*</sup>

8

9 <sup>1</sup> Division of Cardiology, Department of Medicine, Pittsburgh Heart, Lung, Blood and Vascular  
10 Medicine Institute, University of Pittsburgh, Pittsburgh, Pennsylvania, USA.

11 <sup>2</sup> current address - Institute for Experimental Cardiovascular Medicine, University Heart Centre  
12 Freiburg–Bad Krozingen, Medical Center and Faculty of Medicine, University of Freiburg,  
13 Freiburg, Germany.

14 <sup>3</sup> Aging Institute, Division of Geriatrics, Department of Medicine, University of Pittsburgh,  
15 Pittsburgh, Pennsylvania, USA.

16 <sup>4</sup> Department of Cardiovascular Medicine, Cleveland Clinic, Cleveland, OH, USA.

17 <sup>5</sup> Division of Pulmonary, Allergy, and Critical Care Medicine, University of Pittsburgh School of  
18 Medicine, Pittsburgh, PA, USA.

19 <sup>6</sup> Division of Cardiac Surgery, Department of Cardiothoracic Surgery, Heart and Vascular  
20 Institute, University of Pittsburgh Medical Center, Pittsburgh, Pennsylvania, USA.

21 <sup>7</sup> Division of Cardiac Surgery, Univ. of Maryland School of Medicine, Baltimore, MD, USA.

22 <sup>8</sup> Department of Surgery, Division of Cardiac Surgery, Brigham and Women's Hospital &  
23 Harvard Medical School, Boston, Maryland, USA.

24 <sup>9</sup> Department of Bioengineering, University of Pittsburgh, Pittsburgh, Pennsylvania, USA.

25

26 Running Title: TERT/STAT5 is required for cardiovascular calcification

27

28 \*Corresponding Author Contact Info:

29 Cynthia St. Hilaire, PhD, FAHA

30 University of Pittsburgh

31 BSTWR 1744.1

32 200 Lothrop Street, Pittsburgh, PA 15261

33 +1 412-648-9441 sthilair@pitt.edu

34

35 TOTAL WORD COUNT: 5062

36 ABSTRACT WORD COUNT: 301

37

38 **Background:** Calcific aortic valve disease (CAVD) is the pathological remodeling of the valve  
39 leaflets which leads to heart failure and high stroke risk. While several mechanisms are known  
40 to drive cardiovascular calcification, the initial steps orchestrating the osteogenic reprogramming  
41 of cells are not fully understood. Non-canonical functions of telomerase reverse transcriptase  
42 (TERT) include service as a cofactor to stimulate gene transcription, and TERT overexpression  
43 primes mesenchymal stem cells to differentiate into osteoblasts. We investigated whether TERT  
44 contributes to osteogenic reprogramming of valve interstitial cells.

45 **Methods:** Baseline transcription of TERT and osteogenic markers, senescence, DNA damage,  
46 and telomere length in valve tissue and primary aortic valve interstitial cells (VICs) from control  
47 and CAVD patients were assessed. TERT expression was depleted in cells using lentiviral  
48 vectors. Cells from *Tert*<sup>+/+</sup> and *Tert*<sup>-/-</sup> mice were used to validate human findings.  
49 Immunofluorescence staining, proximity ligation assay, and chromatin immunoprecipitation  
50 assay were used in mechanistic experiments.

51 **Results:** TERT protein was highly expressed in calcified valve leaflets, without changes in  
52 telomere length, DNA damage, or senescence. These phenotypic features were retained in  
53 primary VICs isolated and cultured from those diseased tissues. TERT levels were increased  
54 with osteogenic or inflammatory stimuli, and genetic deletion or reduction of *TERT* prevented  
55 calcification of VICs isolated from humans and mice. Similar results were seen in smooth  
56 muscle cells (SMCs) and mesenchymal stem cells (MSCs). TERT and Signal Transducer and  
57 Activator of Transcription 5A/B (STAT5) colocalize and bind to the Runt-Related Transcription  
58 Factor 2 (*RUNX2*) gene promoter, and TERT and STAT5 co-localized in calcified valve tissues.  
59 Pharmacological inhibition of STAT5A prevented calcification in vitro.

60 **Conclusions:** These data show that non-canonical TERT activity is required for the calcification  
61 of VICs. TERT partners with STAT5A to bind to and activate the *RUNX2* gene promoter. These  
62 data identify a novel therapeutic target to abate vascular calcification.

63

#### 64 **ABBREVIATIONS:**

65  $\alpha$ SMA, alpha 2 smooth muscle actin; VICs, aortic valve interstitial cells; CAVD, calcific aortic  
66 valve disease; ChIP, chromatin immunoprecipitation; ECM, extracellular matrix;  $\gamma$ -H2AX,  
67 phosphorylated gamma histone 2AX; LPS, lipopolysaccharide; BMMSCs, bone marrow  
68 mesenchymal stem cells; MSCs, Mesenchymal stem cells; NT, no treatment; OPN, osteopontin;  
69 OST, osteogenic treatment; PCNA, proliferating cell nuclear antigen; *RUNX2*, runt-related  
70 transcription factor 2; STAT5, signal Transducer and activator of transcription 5A/B; TERC,  
71 telomerase RNA component; TERT, telomerase reverse transcriptase catalytic subunit; TL,  
72 telomere length;  $\alpha$ TUB, alpha Tubulin

73

74 **Key Words:**

75 aortic stenosis, vascular calcification, calcific aortic valve disease, osteogenic differentiation,  
76 TERT, STAT

77

## 78 **Novelty and Significance**

### 79 *What Is Known?*

80 • Calcific aortic valve disease (CAVD) is the most prevalent form of aortic valve pathology.  
81 CAVD strongly correlates with age and leads to heart failure and a high risk of stroke.  
82 Currently, the only therapeutic option is valve replacement, which comes with significant  
83 healthcare costs and additional risks to patients.

84 • Runt-related transcription factor 2 (RUNX2) is the master transcription factor required for  
85 osteogenic differentiation of osteoblasts and osteogenic reprogramming of vascular cells,  
86 yet the early events driving its transcription in valve cells are not well defined.

87 • Overexpression of TERT primes mesenchymal stem cells to differentiate down the  
88 osteoblast lineage, suggesting that TERT signaling plays an important role in cell  
89 differentiation and phenotype.

90

### 91 *What New Information Does This Article Contribute?*

92 • TERT protein is highly expressed in calcified aortic leaflets and valve interstitial cells,  
93 independent of changes in telomere length.

94 • Genetic loss or depletion of TERT blocks calcification in valve interstitial cells, coronary  
95 smooth muscle cells, and mesenchymal stem cells.

96 • TERT co-localizes with STAT5 in the cytosol and on the *RUNX2* gene promoter, the master  
97 regulator of osteogenic transcriptional programs.

- 98 • Pharmacological inhibition of STAT5 prevents calcification of human valve interstitial cells,  
99 coronary smooth muscle cells, and mesenchymal stem cells.

100

101 *What are the clinical implications?*

- 102 • We have identified TERT/STAT5 as novel signaling axis that promotes the early  
103 transcriptional reprogramming in cardiovascular cells. Inhibiting TERT and STAT5  
104 interaction and activity can be leveraged for the development of pharmacological or  
105 biological therapeutic strategies to halt or prevent calcification in the aortic valve and  
106 perhaps other cardiovascular tissues.
- 107 • Surgical procedures are currently the only treatment option for patients with CAVD.  
108 Discovering the early events driving vascular calcification identifies novel and druggable  
109 targets for the development of non-surgical therapies.

110

111 **INTRODUCTION**

112 Calcific aortic valve disease (CAVD) encompasses a spectrum of pathological remodeling of the  
113 valve leaflet, ranging from mild valve thickening that displays microcalcifications to  
114 macrocalcifications that predominate in more advanced disease stages.<sup>1</sup> Aortic stenosis results  
115 from fibrotic remodeling and the formation of calcified nodules on the valve leaflet that impede  
116 and disrupt blood flow, causing excessive strain on the cardiac tissue, increasing the risk of  
117 stroke, and leading to heart failure.<sup>2</sup> CAVD severity and incidence increase with age. CAVD  
118 prevalence rapidly increases with age and is >1,000 per 100,000 individuals  $\geq 75$  years of  
119 age.<sup>3,4</sup> Further, roughly 1-2% of the population harbors bicuspid aortic valve malformations, and  
120 these malformed valves are prone to calcify and develop CAVD.<sup>5</sup> Currently there is no  
121 therapeutic treatment that halts or reverses pathologic calcification that occurs in the valve  
122 leaflets, or other cardiovascular tissues. The only therapeutic option to treat aortic stenosis is  
123 valve replacement via surgical or transcatheter procedures, incurring substantial medical costs  
124 and health care burden to the patient.<sup>6</sup>

125

126 Aortic valve interstitial cells (VICs) are the primary cell type of the valve leaflet and are  
127 responsible for maintaining valvular integrity. VICs reside in a quiescent state; however,  
128 adaptive or maladaptive responses to environmental factors such as inflammation, breakdown  
129 of the extracellular matrix (ECM), and mechanical stress may disrupt VIC homeostasis.<sup>7,8</sup> With  
130 alterations in homeostasis, VICs acquire a myofibroblast-like phenotype, termed “activated  
131 VICs,” capable of proliferation, contraction, and secretion of proteins that further remodel the  
132 extracellular milieu.<sup>9</sup> Activated VICs can transition into a calcifying cell; however, how the initial  
133 steps regulating the osteogenic switching of cells are not fully understood. It is well established  
134 that the osteogenic differentiation of VICs and also vascular smooth muscle cells (SMCs) is

135 similar to the differentiation of mesenchymal stem cells (MSCs) into bone-forming osteoblasts;  
136 osteogenic differentiation is primarily orchestrated by Runt-related transcription factor 2  
137 (*RUNX2*), the master transcriptional regulator of osteogenic transcriptional programs.<sup>10-12</sup> Other  
138 osteogenic signature markers such as osteocalcin, alkaline phosphatase, and osteopontin are  
139 also upregulated in calcifying stem and valvular cells.<sup>9,13</sup> While it is accepted that VICs  
140 upregulate the expression of osteogenic genes in response to stresses such as inflammation,  
141 extracellular matrix (EMC) remodeling, and mechanical stress, the causal relationship between  
142 those stresses and the initial events in the activation of osteogenic transcriptional  
143 reprogramming remains ill-defined.

144

145 The telomerase complex consists of the telomerase RNA component (TERC) and telomerase  
146 reverse transcriptase (TERT) protein, and functions to maintain chromosome telomere length  
147 and genome integrity.<sup>14</sup> Independent of telomerase activity, TERT also exhibits non-canonical  
148 functions. TERT can regulate gene expression and help orchestrate chromatin remodeling.<sup>15-17</sup>  
149 For example, TERT acts as a cofactor in Wnt-dependent promoter activation by interacting with  
150 the chromatin remodeling protein Brahma-related gene 1 (BRG1), facilitating the expression of  
151 Wnt/ $\beta$ -catenin target genes.<sup>18</sup> In a murine model of atherosclerosis TERT induced chromatin  
152 remodeling and SMC proliferation by chaperoning the retinoblastoma-associated transcription  
153 factor 1 (E2F1) binding to S-phase gene promoters.<sup>19,20</sup> Linking together the themes of  
154 calcification and non-canonical TERT, two contemporary studies identified that the  
155 overexpression of *TERT* primed human MSCs to differentiate down the osteogenic lineage and  
156 develop bone-like structures.<sup>21,22</sup> The mechanism by which TERT drives the osteogenic  
157 differentiation of human MSCs is unknown. Collectively, these studies provide strong evidence  
158 of telomerase-independent functions of TERT in altering chromatin states and regulating gene  
159 expression via various protein-protein interactions.

160

161 In this study, we tested the hypothesis that TERT contributes to the osteogenic transition of  
162 VICs. We utilized primary human aortic valve tissues from healthy control donors and CAVD  
163 patients and generated patient-specific VIC lines for in vitro disease modeling. We established  
164 baseline patterns and osteogenic induction of *TERT* and calcification markers in CAVD tissue  
165 and VICs, and assessed the consequences of genetic deletion or depletion of *TERT* during  
166 osteogenic differentiation in several cell types. We further defined the underlying mechanism by  
167 which TERT and STAT5 participate in the osteogenic transition of VICs.

## 168 **METHODS**

### 169 **Data Availability**

170 The Materials and Methods and the Major Resources Table are available in the Supplemental  
171 Material. The data that support the findings of this study, experimental materials, and analytic  
172 methods are available from the corresponding author upon reasonable request.

## 173 **RESULTS**

### 174 **TERT is upregulated in CAVD valve tissue**

175 Human aortic valves were collected after surgical aortic valve replacement procedures or from  
176 cadaveric tissue obtained via the Center for Organ Recovery and Education (CORE) of the  
177 University of Pittsburgh and processed as previously described.<sup>23</sup> Macroscopic examination and  
178 histological staining with Von Kossa were used to determine and confirm whether valves could  
179 be classified as a non-calcified control or as having calcific aortic valve disease (CAVD) (**Figure**  
180 **1A, Supplemental Figure 1A, Table 1 and 2: Patient Information**). RUNX2 is the master  
181 transcription factor required for stem cells to differentiate into osteoblasts,<sup>24</sup> and is critical for the  
182 pathological osteogenic differentiation of vascular cells.<sup>25</sup> Immunofluorescent staining of the  
183 early calcification marker RUNX2 and the late calcification marker OPN show they were



184 significantly upregulated in CAVD tissue compared to control tissues, indicating activation of  
185 osteogenic transcriptional programs in CAVD tissues (**Supplemental Figure 1B**). As TERT is  
186 highly expressed in stem cells and its overexpression primes MSCs to differentiate into the  
187 osteogenic lineage,<sup>21,22</sup> we analyzed the expression of the *TERT* transcript and found that it was  
188 significantly upregulated in CAVD tissue relative to control samples (**Figure 1B**), and its levels  
189 positively trend with the donor's age (**Supplemental Figure 1C**). The expression of genes  
190 involved in senescence (Cyclin Dependent Kinase Inhibitor 1A (*CDKN1A*) and Galactosidase  
191 Beta 1 (*GLB1*)), proliferation (Proliferating Cell Nuclear Antigen (*PCNA*)), DNA damage (Tumor  
192 Protein 53 (*TP53*)), and cytoskeletal markers (actin Alpha 2 Smooth Muscle/ $\alpha$ SMA (*ACTA2*);  
193 Vimentin (*VIM*)) and interleukin 6 (*IL6*) showed no differences, while the inflammatory marker  
194 and tumor necrosis factor alpha (*TNF*) was elevated in CAVD samples (**Supplemental Figure**  
195 **1D**), suggesting a role for inflammatory signaling in calcification pathogenesis, as also observed  
196 by others.<sup>26,27</sup>

197  
198 TERT protein expression and distribution was analyzed in serial sections of control and CAVD  
199 tissues. We detected an elevated TERT protein signal in CAVD valves compared to controls,  
200 with the signal localized to areas of calcification, and the number of cells expressing TERT was  
201 significantly elevated in CAVD tissues compared to non-calcified control tissues (**Figure 1C**).  
202 TERT was observed in both nuclear and cytosolic areas (**Supplemental Figure 1E**). No  
203 differences were detected in the staining levels of proliferation marker proliferating cell nuclear  
204 antigen (PCNA) or the DNA damage indicator phosphorylated gamma histone 2AX ( $\gamma$ -H2AX),  
205 between CAVD and control tissues (**Supplemental Figure 1F**). We found no differences in  
206 relative mean telomere length between control and CAVD tissues (**Figure 1D**), indicating similar  
207 canonical telomere extending functions of TERT in both groups. The mean age of CAVD and  
208 control patients in this study was 68 and 54 years old, respectively (**Figure 1E**). Together, these

209 data show that TERT, osteogenic markers, and inflammatory signatures are upregulated in  
210 CAVD tissue while markers indicating alterations in proliferation, DNA damage, and senescence  
211 are not altered in CAVD leaflets. Importantly, despite the elevated TERT expression and protein  
212 levels, telomere length remains unaltered between CAVD and control tissue, suggesting non-  
213 canonical TERT activity.

214

### 215 **CAVD in vitro disease modeling with VICs recapitulates in vivo observations**

216 We created patient-specific VIC lines isolated from CAVD and control valves.<sup>23</sup> At baseline,  
217 VICs freshly isolated from CAVD and control patients exhibited no morphological, proliferative,  
218 or migratory differences (**Figures 2A, 2B, 2C, and Supplemental Figure 2A**, respectively)  
219 while TERT and RUNX2 proteins were significantly elevated in CAVD VICs (**Figure 2D**). At  
220 baseline, we observed no differences between CAVD and control VICs in SM22 or  $\alpha$ SMA —  
221 markers of an activated VIC phenotype (**Supplemental Figure 2B**)— but found significantly  
222 higher levels of the mineralizing enzyme tissue non-specific alkaline phosphatase (TNAP) in  
223 CAVD VICs (**Supplemental Figure 2C**). Like in the leaflet, there was no difference in the mean  
224 telomere length between CAVD and control groups (**Figure 2E**). Thus, these data show that at  
225 baseline, VIC isolated from CAVD patients display elevated TERT and RUNX2 expression,  
226 recapitulating the osteogenic phenotype observed in CAVD leaflet tissue, and confirming the  
227 telomere activity of TERT is not operative in these established cells lines.

228

### 229 **TERT expression is upregulated in VICs under osteogenic conditions**

230 To model CAVD disease in vitro and establish a role for TERT during VIC osteogenesis, we  
231 cultured CAVD and control VICs in osteogenic media conditions (OST, see Methods Section), a  
232 media widely utilized to induce osteogenic differentiation of osteoblasts.<sup>28</sup> Calcification was  
233 visualized using Alizarin Red stain and revealed that OST-treated CAVD and control VICs lay

234 down calcified matrix as early as 14 days (d14), and CAVD VICs calcified earlier relative to  
235 control VICs under the same conditions. Importantly, we observed that CAVD VICs calcify de  
236 novo under no treatment (NT) conditions, suggesting that CAVD VICs are primed for  
237 osteogenesis (**Figure 3A**). Protein analysis revealed increased levels of TERT in control VICs at  
238 d14 of OST treatment, while in CAVD VICs TERT was elevated under NT conditions,  
239 suggesting that TERT has an active role in the osteogenesis of VICs. The calcification markers  
240 RUNX2 and OPN were upregulated indicating active osteogenesis (**Figure 3B**).  
241 Immunofluorescent staining of VICs showed that at d14 under NT conditions, TERT was  
242 elevated in CAVD VICs relative to control VICs (**Figure 3C**, left panels) and that TERT signal  
243 was intensified on d14 of OST treatment (**Figure 3C**, right panels). While both control and  
244 CAVD VICs exhibit calcification on d14, CAVD VICs form larger calcified nodules (**Figure 3C**,  
245 right panels), and we observed no differences in cell numbers at the end of the 14-day assay  
246 under NT or OST treatment conditions (**Supplemental Figure 3A**). Transcriptional analysis  
247 showed that the osteogenic markers *BMP2*, *THBS1*, *ALPL*; myofibroblast markers *CNN1*,  
248 *TAGLN*, *SMTN*; calcification-associated gene *FOXO1*,<sup>29</sup> and the CAVD-associated  
249 metalloproteinase *MMP13*<sup>30</sup> were significantly upregulated in control VICs at d14 of OST  
250 treatment. We also found significant upregulation of the pro-inflammatory transcription factor  
251 Signal Transducer and Activator of Transcription 5A (*STAT5A*) gene while the expression of the  
252 isoform *STAT5B* gene remained unchanged (**Figure 3D**). These results confirmed that VICs  
253 undergo osteogenesis as opposed to de novo mineral nucleation.<sup>31</sup>

254

255 In cancer and stem cells, the enhanced canonical activity of TERT leads to long telomeres and  
256 enables unlimited proliferation,<sup>32</sup> while short telomeres can trigger cellular senescence.<sup>33</sup>  
257 Although we observed no differences in telomere length (**Figure 1D and 2E**), we assessed  
258 cellular senescence. We observed no differences in the expression of senescence-associated

259  $\beta$ -galactosidase (SA- $\beta$ -gal, *BGLAP*) between CAVD and control VICs at baseline  
260 **(Supplemental Figure 3B)**, or during osteogenic treatment (**Figure 4D**). We further assessed  
261 cellular senescence by senescence-associated  $\beta$ -galactosidase activity assay. We found that  
262 the osteogenic treatment did not trigger cellular senescence even after 28 days (**Supplemental**  
263 **Figure 3C**). These data confirmed that cellular senescence is not operative during the VIC  
264 osteogenesis.

265

### 266 **TERT is required for in vitro calcification**

267 Previous studies have shown that the overexpression of TERT primes human MSCs (hMSCs)  
268 to differentiate into osteoblasts.<sup>21,22</sup> To determine whether TERT is required for the calcification  
269 of human VICs, we transduced these VICs with a lentivirus expressing an shRNA targeting  
270 *TERT*. Knockdown of *TERT* caused inhibition in the calcification of VICs relative to VICs  
271 transduced with a scramble shRNA control, and downregulation of RUNX2 in human VICs  
272 (**Figures 4A and 4B**). Next, we assessed whether inhibition of the canonical telomere extending  
273 activity of TERT altered calcification of VICs. Cells under OST treatment were given the inhibitor  
274 BIBR1532, which blocks the reverse transcriptase activity of TERT, required for telomere  
275 extension.<sup>34</sup> A 28-day OST assay treatment with BIBR1532 did not alter the calcification of VICs  
276 (**Figure 4C**), suggesting that the canonical telomere-extending function of TERT is not required  
277 during VIC osteogenesis. Next, we assessed whether TERT was involved in the osteogenic  
278 reprogramming of other cell types. In human coronary artery smooth muscle cells (CASMCs),  
279 knockdown of TERT also inhibited calcification (**Figure 4D**). To validate these findings and  
280 confirm a broader role for TERT in osteogenic differentiation, we investigated TERT's effect in  
281 human MSCs. Human MSCs exhibited robust calcification as early as day 14 of the OST  
282 treatment, while cells in NT conditions did not calcify (**Supplemental Figure 4A**). Protein  
283 analysis showed TERT protein level increases on day 3 of the OST differentiation, coinciding

284 with the increase in *RUNX2* expression and RUNX2 protein levels (**Supplemental Figures 4B**  
285 **and 4C**). Like human VICs, human MSCs in OST treatment exhibited intense TERT staining,  
286 and TERT-positive cells clustered around calcified nodules (**Supplemental Figure 4D**). As in  
287 our previous assays, the knockdown of *TERT* inhibited calcification of human MSCs  
288 (**Supplemental Figures 4E and 4F**). Together, these data suggest that TERT is required for  
289 the osteogenic differentiation of human VICs, CASMCs, and MSCs.

290

291 To further confirm our findings that TERT is required for calcification, we utilized a genetic  
292 approach. Murine VICs (mVICs) and bone marrow MSCs (mBMMSCs) were isolated and  
293 expanded from *Tert*-knockout (*Tert*<sup>-/-</sup>) and wild-type (*Tert*<sup>+/+</sup>) mice.<sup>35</sup> *Tert*<sup>-/-</sup> mice were generated  
294 from heterozygous breeding pairs (F1 generation) and thus do not exhibit shortened  
295 telomeres.<sup>36</sup> In support of our findings in the human cells with depletion of *TERT*, we found that  
296 deletion of *Tert* drastically inhibited calcification of mVICs and mBMMSCs compared to *Tert*<sup>+/+</sup>  
297 cells, which exhibited robust calcification, as revealed at d21 of OST treatment by Alizarin Red  
298 staining (**Figures 5A and 5B**). Notably, TERT deficiency or OST treatment did not induce  
299 senescence in mice *Tert*<sup>-/-</sup> cells as determined by SA- $\beta$ -gal activity (**Supplemental Figures 5A**  
300 **and 5B**). Together, these data show that TERT is required for the osteogenic transition of mice  
301 VICs and BMMSCs, and that senescence is not operative during the osteogenic differentiation  
302 of murine cells.

303

#### 304 **TERT Interacts with STAT5 to bind the *RUNX2* gene promoter**

305 TERT exerts transcriptional gene regulation in various tissues and cells by physically interacting  
306 with transcription factors such as NF- $\kappa$ B, Sp1, and E2F1.<sup>17,20,37,38</sup> Increased RUNX2 expression  
307 and activity is the hallmark of osteoblast differentiation and vascular calcification.<sup>25</sup> RUNX2 is  
308 the master regulator of osteogenic differentiation and we found that RUNX2 is downregulated in

309 *TERT*-knockdown cells (**Figure 4**). We used the LASAGNA<sup>39</sup> and TRANSFAC/MATCH<sup>40</sup>  
310 programs to identify putative transcription factor binding sites in the 5kb region upstream of the  
311 human *RUNX2* gene promoter (NM\_001015051.3) and identified 13 potential STAT5 binding  
312 sites (**Table 2**). We observed increased expression of *STAT5A* during the osteogenic  
313 differentiation of VICs (**Figure 3D**). Two different genes encode *STAT5A* and *STAT5B*, but 96%  
314 of their amino acid sequence is shared and their activities redundant; herein we refer to both  
315 genes as *STAT5* when available tools (e.g. antibodies) do not allow for isoform differentiation.<sup>41</sup>  
316 We found that OST treatment upregulated *STAT5* protein in VICs, and *STAT5* was detected in  
317 the nucleus of OST-stimulated VICs (**Supplemental Figures 6A and 6B**). Next, we utilized  
318 proximity ligation (PLA) to examine *TERT* and *STAT5* colocalization, as this technique is  
319 capable to detect interacting proteins in a proximity range below 40 nm. PLA revealed that  
320 *TERT* and *STAT5* significantly colocalized in control VICs after 21 days of OST treatment  
321 (**Supplemental Figure 6C**). Likewise, *TERT/STAT5* colocalization was elevated in CAVD VICs  
322 after 21 days of OST treatment compared to control VICs (**Figure 6A**). We next sought to  
323 determine whether *TERT* and *STAT5* are bound to the *RUNX2* gene promoter region. We  
324 identified 13 potential *STAT5* binding sites (**Table 2**) and focused on sites -1371 bp and -193 bp  
325 upstream of the start site as both have high homology to the tetrameric consensus *STAT5*  
326 binding site and show an elevated likelihood of being functional sites (core and matrix scores of  
327 0.788 and 0.834, and 0.995 and 0.882, respectively, **Figure 6B**). Chromatin  
328 immunoprecipitation analysis (ChIP) in control VICs shows that *STAT5* binds to the *RUNX2*  
329 promoter at both sites, and that the binding enrichment was significantly higher during  
330 osteogenic differentiation (**Figure 6C**). While we found that *TERT* also binds to -1371 bp and -  
331 193 bp of *RUNX2* promoter, the trending enrichment during OST treatment did not reach  
332 statistical significance, perhaps suggesting that *TERT* itself does not bind to DNA directly but  
333 sits alongside *STAT5* on the *RUNX2* gene promoter.

334

335 We utilized a pharmacological approach to identify whether one or both STAT5 proteins  
336 contribute to osteogenic reprogramming. We treated human VICs with the small molecules  
337 StafiA-1 and StafiB-1, which have been reported to specifically inhibit STAT5A and STAT5B,  
338 respectively.<sup>42,43</sup> We found that StafiA-1 significantly inhibited calcification of VICs during a 21  
339 days OST assay and that this inhibition was of a greater extent than the inhibition observed  
340 when VICs were treated with StafiB-1, suggesting that STAT5A is the main participant during  
341 the osteogenic reprogramming of VICs (**Figure 6D**). Similarly, we found that StafiA-1  
342 significantly reduced the calcification in human CASMCs and MSCs while StafiaB-1 did not  
343 (**Supplementary Figures 6D and 6E**). Together, these data show that TERT and STAT5A  
344 interact to localize STAT5A to its cognate sites in the *RUNX2* promoter to drive osteogenic  
345 transcriptional reprogramming.

346

347 We explored the mechanism by which TERT and STAT5 become activated during the  
348 osteogenic differentiation of human VICs. As inflammation contributes to CAVD pathogenesis,<sup>44</sup>  
349 we used bacterial lipopolysaccharide (LPS) to trigger inflammatory response pathways in VICs<sup>45</sup>  
350 and found that LPS was sufficient to induce calcification of VICs. Like OST treatment, TERT-  
351 positive cells accumulated near calcified nodules after LPS and osteogenic stimulation  
352 (**Supplementary Figure 6F**). Protein analysis showed that LPS alone was also sufficient to  
353 upregulate TERT, RUNX2, and STAT5 proteins (**Supplementary Figure 6G**). Together, these  
354 observations indicate that LPS/TLR4 inflammatory signaling pathway participates in the  
355 regulation of TERT and the osteogenic transition of human VICs.

356

357 **TERT and STAT5 are upregulated in CAVD tissue**

358 Our data illustrate a requirement of TERT for calcification and show TERT/STAT5A drives  
359 osteogenic reprogramming by binding to the *RUNX2* gene promoter. To confirm the role of  
360 these proteins in vivo, we quantified the staining of TERT and STAT5 in human valves. We  
361 found that STAT5 protein is highly expressed in the CAVD leaflet and localized to areas of  
362 calcification, mirroring TERT distribution in the valve leaflet, while the number of STAT5-positive  
363 cells was significantly increased in CAVD tissue (**Figure 7A**). Furthermore, STAT5 highly  
364 colocalized to TERT-positive cells in the valve (**Figure 7B**). Altogether, these data support our  
365 in vitro investigations and suggest that TERT contributes to CAVD pathogenesis via its  
366 interaction with STAT5A.

367

## 368 **DISCUSSION**

369 This study reveals a novel mechanism for TERT in driving a human pathology (**Figure 8**). These  
370 data establish that TERT is upregulated in CAVD tissue and in primary cell lines derived from  
371 those tissues, and that TERT is required for the osteogenic transition of vascular cells. The  
372 mechanism by which TERT promotes the osteogenic reprogramming of VICs is via interaction  
373 with STAT5, and this complex binds to the *RUNX2* gene promoter. Depletion of TERT or  
374 pharmacological inhibition of STAT5 blocked calcification in vitro, and TERT/STAT5 puncta  
375 were observed on CAVD but not control human aortic valves. Collectively, these experiments  
376 support a novel role for TERT and STAT5 in driving CAVD pathogenesis and identify a unique,  
377 druggable target for cardiovascular calcification.

378

379 TERT is well-known for its canonical, telomere-extending activity, yet TERT also regulates gene  
380 expression and chromatin remodeling independent of affecting telomere integrity. For example,  
381 previous reports have shown that TERT interacts physically with several transcription factors to



382 promote the expression of several genes, including  $\beta$ -catenin to stimulate genes involved in  
383 bone development.<sup>15,16,37</sup> In the vasculature, TERT binds to the transcription factors SP1 at the  
384 *VEGF* promoter and E2F1 at *MCM7*, *CCNA1*, and *PCNA* promoters, stimulating SMC  
385 proliferation and neointima formation.<sup>20,35,38,46</sup> In this regard, we did not detect proliferative or  
386 migratory differences between control and CAVD VICs despite elevated levels of TERT at  
387 baseline (**Figures 2B and 2C**).

388  
389 In addition to supporting transcription factor function, TERT also acts as a cofactor to  
390 orchestrate chromatin remodeling machinery. TERT serves as a chaperone to facilitate the  
391 recruitment of BRG1 and histone acetyltransferases to stimulate chromatin accessibility and  
392 transcription or to maintain heterochromatin structure.<sup>18,47,48</sup> Loss of TERT abrogates the cellular  
393 response to DNA double-strand breaks and alters the overall chromatin configuration, without  
394 affecting the short-term telomere integrity.<sup>17</sup> These data strongly support the prominent role of  
395 non-canonical functions of TERT. We found that TERT interacts with STAT5 and together, are  
396 recruited to two consensus sites in the *RUNX2* gene promoter during osteogenic  
397 reprogramming of VICs. Our observations that TERT is upregulated in CAVD tissue and during  
398 VIC osteogenesis support this hypothesis. Furthermore, our findings that *TERT* depletion  
399 reduced *RUNX2* expression and calcification in several cell types, along with the finding of  
400 others that *TERT* overexpression drives osteogenesis in human MSC,<sup>21,22</sup> support a general  
401 role for TERT modulating cellular phenotypic transition and osteogenic reprogramming. From  
402 the studies mentioned above, one can speculate that perhaps TERT serves as a co-factor  
403 bridging chromatin remodeling complexes and transcription factors to facilitate euchromatin  
404 stability.

405

406 Cell replication progressively shortens telomeres, triggering senescence, yet telomere length  
407 varies widely between people of the same age.<sup>49</sup> Telomere length is considered a biomarker of  
408 aging, and several studies have utilized circulating leukocytes to investigate whether shortened  
409 telomeres correlate with various vascular disease states.<sup>50,51</sup> One study correlated circulating  
410 leukocytes as surrogates to interrogate the telomere length of patients diagnosed with CAVD  
411 featuring aortic stenosis and found that CAVD leukocytes had slightly shorter telomeres than  
412 age-matched healthy controls.<sup>52</sup> However, telomere length in leukocytes is not indicative of  
413 global telomere length, telomerase complex activity, or TERT protein function in all cell types.  
414 First, short telomeres may reflect increased circulating leukocyte turnover due to systemic  
415 inflammation, as leukocytes are highly proliferative. Second, telomere attrition might be a tissue-  
416 and disease-dependent process. Third, these correlative studies show no clear evidence of a  
417 causal link between telomere length, non-canonical TERT activity, and disease progression. In  
418 this regard, Huzen et al. compared the telomere length of the leukocytes of age-matched  
419 healthy controls and patients with atherosclerosis as well as the telomere length of the cells in  
420 the atherosclerotic plaques of the patients. They found that while telomere length in leukocytes  
421 from the atherosclerosis patient group was significantly shorter than in the control group,  
422 telomere length in the atherosclerotic plaques was significantly longer, indicative of increased  
423 telomerase activity.<sup>53</sup> Thus, total leukocyte telomere length does not represent telomere length  
424 in the diseased tissue itself. Our approach examined TERT protein expression directly in the  
425 valve tissue and in patient-specific VICs. With these tools, we determined that the expression  
426 levels of TERT and osteogenic markers in CAVD tissue were elevated, without changes in  
427 telomere length, proliferation, and DNA damage markers; thus, suggesting a non-canonical role  
428 for TERT in these cells.  
429

430 VIC calcification shares aspects of the transcriptional program observed during the  
431 differentiation of MSCs into osteoblasts, including the upregulation of *RUNX2*, *BGLAP*, *TNAP*,  
432 and the secretion of bone-forming proteins and accumulation of calcium minerals.<sup>5,10,12</sup> Likewise,  
433 mechanical stress, disturbed flow, and inflammation promote VIC calcification, as well as the  
434 osteogenic differentiation of MSCs.<sup>54</sup> These observations suggest that VICs switch from their  
435 quiescent state and undergo an osteogenic transition like MSCs, acquiring osteoblast-like  
436 phenotypic features. The mechanisms driving these cell transitions are not fully understood. We  
437 have hypothesized that fully differentiated cells can de-differentiate into a transitory, multipotent  
438 stem cell-like state and then acquire an osteogenic phenotype.<sup>55</sup> VICs have the potential to  
439 differentiate into the osteogenic, chondrogenic, or adipogenic lineage, properties comparable to  
440 mesenchymal stem cells.<sup>56</sup> We focused on TERT as it is highly expressed in stem cells and its  
441 overexpression primes mesenchymal stem cells into the osteogenic lineage.<sup>21,22</sup> Thus, we  
442 propose that the upregulation of TERT leads healthy VICs to undergo a de-differentiation  
443 process, likely to involve broad chromatin remodeling and that in an inflammatory milieu, TERT  
444 and STAT5A couple to drive the osteogenic transition of VICs.

445  
446 The osteogenic differentiation of stem cells is orchestrated by *RUNX2*, which is also detected in  
447 the osteogenic reprogramming of vascular cells.<sup>25,57</sup> In a recent transcriptomic study Xu et al.  
448 identified 14 cell populations present in aortic valve tissue samples from two healthy and four  
449 CAVD valves.<sup>58</sup> CAVD was diagnosed via ultrasound imaging, which detects leaflet mobility,  
450 however examining the macroscopic pictures and histological staining of valve leaflets used in  
451 this analysis shows that while these valves are indeed stiff, they do not exhibit robust nodules of  
452 calcification as do the valves in our data set (**Figures 1A, 1C, 5, and Supplemental Figure**  
453 **1A**). Their analysis identified three VIC populations defined by expression of *FOS*, *HSPA6*,  
454 *SPARC*. However, cells from six valves were pooled, with 10.4% of cells coming from control

455 tissue and the remaining 89.6% from CAVD tissues. Bulk transcriptomic data from these tissues  
456 show only a small 1.49-fold increase in *RUNX2* gene expression in CAVD tissues, in stark  
457 contrast with our observations regarding *RUNX2* expression (**Figures 1-3**) and what is currently  
458 accepted.<sup>10-12</sup> Inspection of the publicly available bulk RNA-sequencing data (PRJNA552159)  
459 did not show any increase in *TERT* transcript expression. While hemodynamic data showed  
460 those valves had indeed undergone fibrotic remodeling, only a low number of calcifying cells  
461 were present, as confirmed by their histological staining. This lack of calcification may explain  
462 why *TERT* expression was undetected in their study. In our study, a portion of each patient  
463 valve was used for cell isolation while the rest was utilized for calcification assessment by  
464 histological staining, following a workflow that we developed that guarantee that cells isolated  
465 from surgically removed and postmortem tissues retain their proliferative capacity and  
466 endothelial and interstitial phenotypes in culture.<sup>23</sup>

467  
468 The function of STAT5 in bone formation is multifaceted. While it was shown that STAT5 can  
469 promote the differentiation of MSCs into osteoblasts by upregulation of the osteogenic genes in  
470 a Jak2-dependent manner,<sup>59</sup> a *Stat5a* global knockout mouse exhibited elevated bone mass  
471 and bone mineral density.<sup>60</sup> These conflicting reports indicate that the role of STAT5 in bone  
472 formation and remodeling is complex and more studies are required. STAT5 has diverse  
473 functions as a transcription factor: it interacts with histone acetyltransferases and transcription  
474 factors such as the glucocorticoid receptor, SP1, YY1, and C/EBP $\beta$  to stimulate gene  
475 expression,<sup>61-63</sup> and two studies in cancer cells identified that STAT5 induces *TERT*  
476 expression.<sup>64,65</sup> We found multiple putative STAT5 binding sites in the *RUNX2* promoter region  
477 and provide strong evidence in support of a novel mechanism in CAVD pathogenesis where  
478 *TERT*/STAT5 co-localize, translocate to the nucleus, and activate osteogenic gene transcription  
479 which drives the early events in cellular osteogenic transition.

480

481 While our results are robust, it is important to address the limitations of our study. STAT5A and  
482 STAT5B are two different genes with 96% of their amino acid sequence shared and their  
483 activities redundant.<sup>41</sup> We have determined that VICs express both variants, however, our  
484 antibodies could not differentiate between the two variants, thus it is possible that only one  
485 isoform interacts with TERT to bind the *RUNX2* gene promoter. STAT5 is activated by multiple  
486 cytokines, including IL-2, IL-6, and TNF- $\alpha$ ,<sup>66</sup> and it was shown that IL-2 specifically activates  
487 STAT5 to induce TERT expression in cancer cells.<sup>64</sup> Whether STAT5 first induces TERT  
488 expression, and then TERT and STAT5 together cooperate to control the expression of *RUNX2*  
489 needs to be determined. There is also redundancy regarding STAT1/3/5 functions and  
490 signaling.<sup>67</sup> Our study was not designed to address all the complexities of STAT signaling per se  
491 but rather to investigate the role of TERT utilizing STAT5 as a DNA transcription factor binding  
492 partner to activate an osteogenic transcriptional program; our future studies will investigate the  
493 role of STAT5 further.

494

495 Our work highlights the importance of primary human tissue-based studies. Murine models are  
496 not ideal to study non-genetic drivers of CAVD, as mice do not develop CAVD de novo.<sup>68,69</sup>  
497 Mouse leaflets' structure differs from human leaflets as they lack a trilaminar organization and  
498 present a melanocyte cell population.<sup>70-72</sup> Recent elegant work from the Giachelli group showed  
499 that in mice, calcification happens in the sinus wall and to a lesser extent, at the leaflet hinge,  
500 the region between the leaflet VICs and SMCs of the aorta, with no detectable calcification in  
501 the leaflets after 26 weeks of a high-fat diet in a *LDLR* knockout mice model.<sup>73</sup> This distribution  
502 is similar to the atherosclerotic calcification observed of the aortic root, and it is also found in a  
503 work from the Kobuta group, which detected calcification in the sinus wall after 16 weeks of  
504 valve mechanical injury.<sup>68</sup> Therefore, mice models do not fully recapitulate calcification or

505 pathogenesis of CAVD in humans in terms of leaflet remodeling and calcification; as such,  
506 murine-based studies may not be ideal models for studying human valve disease, positioning  
507 human-based studies as imperative to understand and solve the pathologic calcification of the  
508 valve tissue.

509

510 We have identified a novel and innovative mechanism that contributes to CAVD pathogenesis  
511 by determining a causal link between TERT and the osteogenic differentiation of valve cells.  
512 This study is the first to suggest that a non-canonical function of TERT is operative in CAVD  
513 pathogenesis as we did not detect telomere length differences in our specimens and the cell  
514 lines established out of them. TERT was detected in the cytosol and nuclei of cells, its  
515 expression was required for calcification of several cell systems, and we detected TERT bound  
516 to the *RUNX2* promoter region, dynamically changing its binding during osteogenic  
517 differentiation of VICs, suggesting an active non-canonical role as a STAT5-binding partner.  
518 Current CAVD therapies are surgical, limited to either mechanical or bioprosthetic valve  
519 replacement, and performed only when the disease has progressed to the advanced point of  
520 affecting blood flow and heart function. As TERT and STAT5 become important targets in  
521 cancer therapy, we propose these novel targets may perhaps be leveraged to tackle  
522 calcification disease progression. Studying the disease mechanisms and effects of TERT and  
523 STAT5 interaction in the context of maladaptive dysregulation in the vessels could also better  
524 inform us of potential drugs to disrupt their interaction and prevent, or even reverse CAVD.

525

## 526 **ACKNOWLEDGEMENTS**

527 We would like to acknowledge and thank the Center for Organ Research and Education for their  
528 help and support and thank tissue donors and their families for making this study possible. We  
529 would also like to thank Kristin Konopka, tissue bank coordinator at The Department of

530 Cardiothoracic Surgery, UPMC. We would like to thank Jason Dobbins for his insightful  
531 discussion and critical reading of this manuscript.

532

### 533 **SOURCES OF FUNDING**

534 This study was supported by funds from the National Institutes of Health (R01 HL142932, St.  
535 Hilaire) and the American Heart Association (20IPA35260111, St. Hilaire; 902641, Cuevas).

536

### 537 **DISCLOSURES**

538 The University of Pittsburgh has filed a provisional patent application on behalf of CSH and RAC  
539 regarding technology based on findings presented in this manuscript. IS receives institutional  
540 research support from Atricure and Medtronic and serves as a consultant for Medtronic  
541 Vascular. None of these conflicts of interest are related to this work. All other authors have  
542 nothing to disclose.

543

### 544 **FIGURE LEGENDS**

#### 545 **Figure 1. TERT is upregulated in CAVD valve tissue.**

546 A, Surgically removed specimen of control (top) and CAVD (bottom) human valves. B, TERT  
547 mRNA transcript quantification in control and CAVD valve tissues.  $n = 8$  control,  $n = 9$  CAVD. C,  
548 Representative serial sections of Von Kossa (dark precipitation, top panels) and TERT  
549 immunofluorescent staining (bottom panels) in control and CAVD valve tissues. Scalebar 100  
550  $\mu\text{m}$ . Quantification of TERT intensity and the number of TERT-positive cells on the leaflet is  
551 shown on the right graphs.  $n = 9$  control,  $n = 9$  CAVD. D, Telomere length measurements in  
552 valve tissues.  $n = 16$  control,  $n = 10$  CAVD. E. Age of the patients utilized in this study.  $n = 25$   
553 control,  $n = 16$  CAVD. Data are shown as means  $\pm$  SD.  $P$  values were calculated by the Mann-  
554 Whitney  $U$  test and shown on each graph.

555

556 **Figure 2. Valve interstitial cells isolated from CAVD patients show elevated TERT**  
557 **expression at baseline.**

558 A, Representative images showing cell morphology of control (left) and CAVD (right) VICs.

559 Scalebar 50  $\mu$ m. B, Proliferation of control and CAVD VICs at baseline. n = 3 control, n = 3

560 CAVD. Data represents means  $\pm$  SD. C, Relative migration distances of control and CAVD

561 VICs. n = 10 control, n = 10 CAVD. Representative western blot staining of control and CAVD

562 VICs at baseline. Quantification of protein levels is shown on the right panels. n = 4 control, n =

563 4 CAVD/. E, Telomere length measurements in VICs. n = 8, control, n = 5 CAVD; means  $\pm$  SD.

564 Data are shown as means  $\pm$  SD. *P* values were calculated by the Mann-Whitney *U* test and

565 shown on each graph.

566

567 **Figure 3. TERT is upregulated during osteogenic differentiation of VICs.**

568 A, Representative images of VICs growing in normal conditions (no treatment, NT, left panel) or

569 stimulated with osteogenic media (OST) for 14 days. Calcium deposition was visualized by

570 Alizarin Red staining. Scalebar 50  $\mu$ m. Quantification of calcification is shown as average

571 absorbance  $\pm$  SD on the right graphs. n = 7 control, n = 7 CAVD. B, Representative western blot

572 staining of samples from control and CAVD VICs after 14 days of NT or OST. Quantification of

573 protein levels is shown on the right graphs. n = 4 control, n = 4 CAVD. C, Representative

574 immunofluorescent staining images of TERT in control and CAVD VICs after 14 days of NT or

575 OST. Calcium deposition was visualized by OsteoImage staining. Scalebar 100  $\mu$ m. D.

576 Expression profile control VICs after 14 days of NT and OST treatment. n = 4 NT, n = 4 OST.

577 Data are shown as means  $\pm$  SD. *P* values were calculated by the Mann-Whitney *U* test with \* *P*

578 = 0.0286 in Figure D.

579



580 **Figure 4. TERT is required for osteogenic transition and calcification of human cells.**

581 A, VICs transduced with lentivirus containing either short hairpin scramble (shControl-GFP) or  
582 short hairpin TERT (shTERT-GFP) and followed by OST stimulated for up to 28 days. Calcium  
583 deposition was visualized by Alizarin Red staining. Quantification of calcification is presented as  
584 average absorbance on the right graph. n = 6 shControl, n = 6 shTERT at 21 days and n = 9  
585 shControl, n = 9 shTERT at day 28. Scalebar 400  $\mu$ m. Data are shown as means  $\pm$  SD. B,  
586 Representative western blot staining of VICs transduced with lentivirus containing either  
587 shControl-GFP or shTERT-GFP followed by 7 days of osteogenic stimulation. C. VICs treated  
588 with BIBR1532 and stimulated with osteogenic media for 28 days. Scalebar 50  $\mu$ m.  
589 Quantification of calcification is shown on the right graph. n = 6. Data are shown as means  $\pm$   
590 SD. D, CASMCs transduced with lentivirus containing either shControl-GFP or shTERT-GFP  
591 and stimulated with osteogenic media for up to 21 days. n = 4 shControl, n = 4 shTERT for both  
592 time points. Scalebar 400  $\mu$ m. Quantification of calcification is shown on the right graph. *P*  
593 values were calculated with the Kruskal-Wallis *H* test with Dunn post hoc test and shown on top  
594 of each graph.

595

596 **Figure 5. TERT is required for the osteogenic transition of murine cells.**

597 A, Representative images of mVICs isolated from wild-type (*Tert*<sup>+/+</sup>) or F1 *Tert* knockout (*Tert*<sup>-/-</sup>)  
598 mice and stimulated with osteogenic media for 21 days. Scalebar 100  $\mu$ m. Quantification of  
599 calcification is shown on the right graph. B, Representative images of mBMMSCs isolated from  
600 *Tert*<sup>+/+</sup> or *Tert*<sup>-/-</sup> mice and stimulated with osteogenic media for 21 days. Scalebar 100  $\mu$ m.  
601 Quantification of calcification is presented as average absorbance on the right graphs. All  
602 graphs are n = 4 *Tert*<sup>+/+</sup>, n = 4 *Tert*<sup>-/-</sup>. Data are shown as means  $\pm$  SD. *P* values were  
603 calculated by the Mann-Whitney U test and indicated on each graph.

604

605 **Figure 6. TERT and STAT5 interact to upregulate RUNX2 expression in human VICs.**

606 A, Diagram of proximity ligation assay (PLA, left panel). Representative images of TERT/STAT5  
607 complex (red foci) in CAVD VICs cultured for 21 days in osteogenic medium and detected by  
608 PLA. Scalebar 100  $\mu\text{m}$  (middle panel). Quantification of PLA signal is shown in the right graph.  
609  $n = 4$ . B, Logo analysis depicting the consensus binding site for tetrameric STAT5 (top panel).  
610 Diagram depicting STAT5 and TERT binding RUNX2 promoter and the positions of the  
611 predicted STAT5 binding sites (bottom panel). C, STAT5 (left graphs) and TERT (right graphs)  
612 enrichment on the RUNX2 promoter of control VICs after 14 days of osteogenic stimulation and  
613 quantified by ChIP-qPCR.  $n = 4$ . D, Representative images of control and CAVD VICs treated  
614 with 10  $\mu\text{M}$  of the STAT5 inhibitors StafiA-1 or StafiB-1 during 28 days of osteogenic stimulation.  
615 Scalebar 400  $\mu\text{m}$ .  $n = 8$ , means  $\pm$  SD. Quantification of calcification is shown on the right graph.  
616 Data are shown as means  $\pm$  SD.  $P$  values were calculated by the Mann-Whitney  $U$  test (Figure  
617 A and C) and Kruskal-Wallis  $H$  test (Figure D) and indicated on each graph.

618

619 **Figure 7. TERT and STAT5 are upregulated and colocalize in CAVD tissue.**

620 A, Representative serial sections of Von Kossa (dark precipitation, top panels) and TERT and  
621 STAT5 immunofluorescent staining (bottom panels) in control and CAVD valve tissues.  
622 Scalebar 100  $\mu\text{m}$ . Quantification of STAT5 intensity and STAT5-positive cells (STAT5+) are  
623 shown on the right panels. B, Quantification of STAT5-TERT-positive cells. Data are shown as  
624 means  $\pm$  SD,  $n = 5$  control,  $n = 6$  CAVD.  $P$  values were calculated with the Mann-Whitney  $U$  test  
625 and indicated on each graph.

626

627 **Figure 8. TERT/STAT5 promotes osteogenic reprogramming**

628 Inflammation promotes the upregulation and interaction of TERT and STAT5. Then, the  
629 TERT/STAT5 complex translocates into the nucleus where TERT facilitates STAT5 binding to

630 the promoter region of *RUNX2* gene, to engage the osteogenic reprogramming of VICs during  
631 the early stages of CAVD pathogenesis.

632

633 **Supplemental Figure 1. Characterization of human CAVD valves and correlation of TERT**

634 **expression with age.** A, Representative section of Von Kossa staining in control and valve  
635 CAVD leaflets tissue. Scalebar 1 mm. B, Representative serial sections of RUNX2  
636 immunofluorescent staining (top panels) and OPN (bottom panels) in control and CAVD valve  
637 tissues. Scalebar 100  $\mu$ m. Quantification of RUNX2-positive cells and OPN-positive cells on the  
638 leaflet specimen is shown on the right graphs. n = 5 control, n = 6 CAVD. C, Correlation  
639 between age of the donor and *TERT* expression. n = 8 control, n = 9 CAVD, Pearson correlation  
640 test. D, Expression profile in the subject leaflets. n = 7 control, n = 7 CAVD. E, Confocal images  
641 of a CAVD leaflet. Scalebar 50  $\mu$ m. F, Representative images of immunofluorescent staining of  
642 PCNA (top panels) and  $\gamma$ -H2AX (bottom panels) in control and CAVD valve tissues. Scalebar  
643 100  $\mu$ m. Quantification of PCNA-positive cells and  $\gamma$ -H2AX-positive cells are shown on the right  
644 graphs. n = 4 control, n = 3 CAVD. Data are shown as means  $\pm$  SD. *P* values were calculated  
645 with the Mann-Whitney *U* test (Figures B, G, and F) and two-way ANOVA with the Sidak post  
646 hoc test (heatmap on D).

647

648 **Supplemental Figure 2. VIC migration, activation, and osteogenic markers at baseline.**

649 A, Representative images of a scratch assay in control (top panels) and CAVD (bottom panels)  
650 VICs. Time points are indicated on top of each panel. Blue lines denote the cell migration front.  
651 Scalebar 1 mm. n = 10 control, n = 10 CAVD. B, Representative images of  $\alpha$ SMA and CNN (top  
652 panels) and SM22 (bottom panels) in control and CAVD VICs. Scalebar 50  $\mu$ m. Signal

653 quantification of  $\alpha$ SMA, CNN, and SM22 are shown on the right panels.  $n = 4$  control,  $n = 4$   
654 CAVD. C, Representative images of TNAP and f-Actin signal in control and CAVD VICs.  
655 Scalebar 50  $\mu$ m. Signal quantification of TNAP and f-Actin is shown on the right panels.  $n = 4$   
656 control,  $n = 4$  CAVD. Data are shown as means  $\pm$  SD.  $P$  values were calculated with the Mann-  
657 Whitney  $U$  test and shown on top of each graph.

658

659 **Supplemental Figure 3. Senescence is not operative during the osteogenic differentiation**  
660 **of VICs.**

661 A, Cell counting of control and CAVD VICs after 14 days of NT or OST stimulation.  $n = 4$   
662 control,  $n = 4$  CAVD. B,  $\beta$ -galactosidase (*BGLAP*) mRNA transcript quantification in control and  
663 CAVD VICs at baseline.  $n = 5$  control,  $n = 4$  CAVD. C, Representative images of senescence-  
664 associated  $\beta$ -galactosidase activity staining of VICs after 28 days of NT or OST stimulation.  
665 Blue cells were considered positive for senescence. Quantification of senescence is shown on  
666 the right graph.  $n = 4$  control;  $n = 4$  CAVD. Data are shown as means  $\pm$  SD.  $P$  values were  
667 calculated with the Mann-Whitney  $U$  test (figure A and B) and the Kruskal-Wallis  $H$  test with  
668 Dunn post hoc test and shown on top of each graph.

669

670 **Supplemental Figure 4. TERT is upregulated and required for the osteogenic**  
671 **differentiation of human mesenchymal stem cells.**

672 A, Representative images of human MSCs stimulated with OST for 14 days. Calcium deposition  
673 was visualized by Alizarin Red staining. Quantification of calcification is shown on the right  
674 graph.  $n = 3$ . Scalebar 50  $\mu$ m. B, Western blot staining of samples from MSCs collected during  
675 the 14 days of OST treatment. C, TERT and RUNX2 expression profile of differentiating MSCs  
676 stimulated for 14 days with OST media.  $n = 3$ . D, Representative TERT immunofluorescent  
677 staining images of MSCs stimulated with osteogenic media for 14 days. Scalebar 100  $\mu$ m. E,

678 MSCs transduced with lentivirus containing either shControl-GFP or shTERT-GFP and  
679 stimulated with osteogenic media for up to 21 days. Quantification of calcification is shown on  
680 the right graph.  $n = 4$ ; means  $\pm$  SD. F, Representative western blot staining of MSCs transduced  
681 with lentivirus containing either shControl-GFP or shTERT-GFP followed by 7 days of  
682 osteogenic stimulation. Data are shown as means  $\pm$  SD.  $P$  values were calculated by Kruskal-  
683 Wallis  $H$  test with Dunn pairwise comparison post hoc test (Figure C) and two-way ANOVA with  
684 Tukey post hoc test (Figures A and E).

685

686 **Supplemental Figure 5. Senescence is not operative in mice *Tert*<sup>-/-</sup> cells.**

687 A, Representative images of a senescence-associated  $\beta$ -galactosidase (SA- $\beta$ -gal) staining of  
688 mVICs isolated from wild-type (*Tert*<sup>+/+</sup>) or F1 *Tert* knockout (*Tert*<sup>-/-</sup>) mice after 21 days of OST  
689 stimulation. Blue cells were considered positive for senescence. Quantification of senescence  
690 cells is shown on the right graph. B, Representative images of SA- $\beta$ -gal staining of mBMMSCs  
691 isolated from *Tert*<sup>+/+</sup> or *Tert*<sup>-/-</sup> mice after 21 days of osteogenic stimulation. Blue cells were  
692 considered positive for senescence. Quantification of senescence is shown on the right graph.  
693 Both figures,  $n = 5$  *Tert*<sup>+/+</sup>,  $n = 3$  *Tert*<sup>-/-</sup>. Scalebar 400  $\mu$ m. Data are shown as means  $\pm$  SD.  $P$   
694 values were calculated with the Mann-Whitney  $U$  test and shown on each graph.

695

696 **Supplemental Data Fig 6. STAT5 is upregulated and required during osteogenic  
697 differentiation of VICs.**

698 A, Representative western blot staining of samples from CAVD and control VICs after 14 days of  
699 OST stimulation. Quantification of protein levels is shown on the right graphs.  $n = 4$ , control  $n = 4$   
700 CAVD. B, Representative immunofluorescence image of STAT5 shows subcellular distribution  
701 after 14 days of NT and OST stimulation. Scalebar 40  $\mu$ m. C, Representative images of  
702 TERT/STAT5 complex (red foci) in control VICs and detected by proximity ligation assay (PLA).

703 Scalebar 100  $\mu\text{m}$ . Quantification of PLA is shown on the right graph.  $n = 4$ . D, Representative  
704 images of CASMCs (left panels) treated with 10  $\mu\text{M}$  of the STAT5 inhibitors StafiA-1 or StafiB-1  
705 during the 14 days of OST stimulation. Scalebar 400  $\mu\text{m}$ . Quantification of calcification is shown  
706 on the right graph.  $n = 4$ . E, Representative images of MSCs (left panels) treated with 10  $\mu\text{M}$  of  
707 the STAT5 inhibitors StafiA-1 or StafiB-1 during the 21 days of OST stimulation. Scalebar 400  
708  $\mu\text{m}$ . Quantification of calcification is shown on the right graph.  $n = 4$ . F, Representative  
709 immunofluorescence images of VICs after 14 days of LPS treatment or OST stimulation. Scalebar  
710 50  $\mu\text{m}$ . G, Representative western blot staining of CAVD VICs after 14 days of OST stimulation.  
711 Data are shown as means  $\pm$  SD.  $P$  values were calculated with the Mann-Whitney  $U$  test (Figures  
712 A and B) and the Kruskal-Wallis  $H$  test with Dunn pairwise comparison post-test (Figured D and  
713 E) and indicated in each graph.

714

## 715 REFERENCES

- 716 1. Kraler S, Blaser MC, Aikawa E, Camici GG, Luscher TF. Calcific aortic valve disease:  
717 from molecular and cellular mechanisms to medical therapy. *Eur Heart J.* 2022;43:683-  
718 697. doi: 10.1093/eurheartj/ehab757
- 719 2. Buttner P, Feistner L, Lurz P, Thiele H, Hutcheson JD, Schlotter F. Dissecting Calcific  
720 Aortic Valve Disease-The Role, Etiology, and Drivers of Valvular Fibrosis. *Front*  
721 *Cardiovasc Med.* 2021;8:660797. doi: 10.3389/fcvm.2021.660797
- 722 3. Coffey S, Roberts-Thomson R, Brown A, Carapetis J, Chen M, Enriquez-Sarano M,  
723 Zuhlke L, Prendergast BD. Global epidemiology of valvular heart disease. *Nat Rev*  
724 *Cardiol.* 2021;18:853-864. doi: 10.1038/s41569-021-00570-z
- 725 4. Roth GA, Mensah GA, Johnson CO, Addolorato G, Ammirati E, Baddour LM, Barengo  
726 NC, Beaton AZ, Benjamin EJ, Benziger CP, et al. Global Burden of Cardiovascular  
727 Diseases and Risk Factors, 1990-2019: Update From the GBD 2019 Study. *J Am Coll*  
728 *Cardiol.* 2020;76:2982-3021. doi: 10.1016/j.jacc.2020.11.010
- 729 5. Yutzey KE, Demer LL, Body SC, Huggins GS, Towler DA, Giachelli CM, Hofmann-  
730 Bowman MA, Mortlock DP, Rogers MB, Sadeghi MM, et al. Calcific aortic valve disease:

- 731 a consensus summary from the Alliance of Investigators on Calcific Aortic Valve  
732 Disease. *Arterioscler Thromb Vasc Biol.* 2014;34:2387-2393. doi:  
733 10.1161/ATVBAHA.114.302523
- 734 6. Virani SS, Alonso A, Benjamin EJ, Bittencourt MS, Callaway CW, Carson AP,  
735 Chamberlain AM, Chang AR, Cheng S, Delling FN, et al. Heart Disease and Stroke  
736 Statistics-2020 Update: A Report From the American Heart Association. *Circulation.*  
737 2020;141:e139-e596. doi: 10.1161/CIR.0000000000000757
- 738 7. Rajamannan NM, Evans FJ, Aikawa E, Grande-Allen KJ, Demer LL, Heistad DD,  
739 Simmons CA, Masters KS, Mathieu P, O'Brien KD, et al. Calcific aortic valve disease:  
740 not simply a degenerative process: A review and agenda for research from the National  
741 Heart and Lung and Blood Institute Aortic Stenosis Working Group. Executive summary:  
742 Calcific aortic valve disease-2011 update. *Circulation.* 2011;124:1783-1791. doi:  
743 10.1161/CIRCULATIONAHA.110.006767
- 744 8. Chen JH, Simmons CA. Cell-matrix interactions in the pathobiology of calcific aortic  
745 valve disease: critical roles for matricellular, matricrine, and matrix mechanics cues. *Circ*  
746 *Res.* 2011;108:1510-1524. doi: 10.1161/CIRCRESAHA.110.234237
- 747 9. Liu AC, Joag VR, Gotlieb AI. The emerging role of valve interstitial cell phenotypes in  
748 regulating heart valve pathobiology. *Am J Pathol.* 2007;171:1407-1418. doi:  
749 10.2353/ajpath.2007.070251
- 750 10. Rajamannan NM, Subramaniam M, Rickard D, Stock SR, Donovan J, Springett M,  
751 Orszulak T, Fullerton DA, Tajik AJ, Bonow RO, et al. Human aortic valve calcification is  
752 associated with an osteoblast phenotype. *Circulation.* 2003;107:2181-2184. doi:  
753 10.1161/01.CIR.0000070591.21548.69
- 754 11. Rajamannan NM. Calcific aortic valve disease: cellular origins of valve calcification.  
755 *Arterioscler Thromb Vasc Biol.* 2011;31:2777-2778. doi: 10.1161/ATVBAHA.111.237610
- 756 12. Aikawa E, Libby P. A Rock and a Hard Place: Chiseling Away at the Multiple  
757 Mechanisms of Aortic Stenosis. *Circulation.* 2017;135:1951-1955. doi:  
758 10.1161/CIRCULATIONAHA.117.027776
- 759 13. Wirrig EE, Yutzey KE. Conserved transcriptional regulatory mechanisms in aortic valve  
760 development and disease. *Arterioscler Thromb Vasc Biol.* 2014;34:737-741. doi:  
761 10.1161/ATVBAHA.113.302071
- 762 14. Calado RT, Young NS. Telomere diseases. *N Engl J Med.* 2009;361:2353-2365. doi:  
763 10.1056/NEJMra0903373



- 764 15. Stewart SA, Hahn WC, O'Connor BF, Banner EN, Lundberg AS, Modha P, Mizuno H,  
765 Brooks MW, Fleming M, Zimonjic DB, et al. Telomerase contributes to tumorigenesis by  
766 a telomere length-independent mechanism. *Proc Natl Acad Sci U S A*. 2002;99:12606-  
767 12611. doi: 10.1073/pnas.182407599
- 768 16. Choi J, Southworth LK, Sarin KY, Venteicher AS, Ma W, Chang W, Cheung P, Jun S,  
769 Artandi MK, Shah N, et al. TERT promotes epithelial proliferation through transcriptional  
770 control of a Myc- and Wnt-related developmental program. *PLoS Genet*. 2008;4:e10.  
771 doi: 10.1371/journal.pgen.0040010
- 772 17. Masutomi K, Possemato R, Wong JM, Currier JL, Tothova Z, Manola JB, Ganesan S,  
773 Lansdorp PM, Collins K, Hahn WC. The telomerase reverse transcriptase regulates  
774 chromatin state and DNA damage responses. *Proc Natl Acad Sci U S A*.  
775 2005;102:8222-8227. doi: 10.1073/pnas.0503095102
- 776 18. Park JI, Venteicher AS, Hong JY, Choi J, Jun S, Shkreli M, Chang W, Meng Z, Cheung  
777 P, Ji H, et al. Telomerase modulates Wnt signalling by association with target gene  
778 chromatin. *Nature*. 2009;460:66-72. doi: 10.1038/nature08137
- 779 19. Aono J, Ruiz-Rodriguez E, Qing H, Findeisen HM, Jones KL, Heywood EB, Bruemmer  
780 D. Telomerase Inhibition by Everolimus Suppresses Smooth Muscle Cell Proliferation  
781 and Neointima Formation Through Epigenetic Gene Silencing. *JACC Basic Transl Sci*.  
782 2016;1:49-60. doi: 10.1016/j.jacbts.2016.01.002
- 783 20. Endorf EB, Qing H, Aono J, Terami N, Doyon G, Hyzny E, Jones KL, Findeisen HM,  
784 Bruemmer D. Telomerase Reverse Transcriptase Deficiency Prevents Neointima  
785 Formation Through Chromatin Silencing of E2F1 Target Genes. *Arterioscler Thromb*  
786 *Vasc Biol*. 2017;37:301-311. doi: 10.1161/ATVBAHA.116.308717
- 787 21. Shi S, Gronthos S, Chen S, Reddi A, Counter CM, Robey PG, Wang CY. Bone  
788 formation by human postnatal bone marrow stromal stem cells is enhanced by  
789 telomerase expression. *Nat Biotechnol*. 2002;20:587-591. doi: 10.1038/nbt0602-587
- 790 22. Simonsen JL, Rosada C, Serakinci N, Justesen J, Stenderup K, Rattan SI, Jensen TG,  
791 Kassem M. Telomerase expression extends the proliferative life-span and maintains the  
792 osteogenic potential of human bone marrow stromal cells. *Nat Biotechnol*. 2002;20:592-  
793 596. doi: 10.1038/nbt0602-592
- 794 23. Cuevas RA, Chu CC, Moorhead WJ, 3rd, Wong R, Sultan I, St Hilaire C. Isolation of  
795 Human Primary Valve Cells for In vitro Disease Modeling. *J Vis Exp*. 2021:e62439. doi:  
796 10.3791/62439



- 797 24. Ducy P, Zhang R, Geoffroy V, Ridall AL, Karsenty G. *Osf2/Cbfa1*: a transcriptional  
798 activator of osteoblast differentiation. *Cell*. 1997;89:747-754. doi: 10.1016/s0092-  
799 8674(00)80257-3
- 800 25. Sun Y, Byon CH, Yuan K, Chen J, Mao X, Heath JM, Javed A, Zhang K, Anderson PG,  
801 Chen Y. Smooth muscle cell-specific *runx2* deficiency inhibits vascular calcification. *Circ*  
802 *Res*. 2012;111:543-552. doi: 10.1161/CIRCRESAHA.112.267237
- 803 26. Parra-Izquierdo I, Castanos-Mollor I, Lopez J, Gomez C, San Roman JA, Sanchez  
804 Crespo M, Garcia-Rodriguez C. Calcification Induced by Type I Interferon in Human  
805 Aortic Valve Interstitial Cells Is Larger in Males and Blunted by a Janus Kinase Inhibitor.  
806 *Arterioscler Thromb Vasc Biol*. 2018;38:2148-2159. doi: 10.1161/ATVBAHA.118.311504
- 807 27. Parra-Izquierdo I, Castanos-Mollor I, Lopez J, Gomez C, San Roman JA, Sanchez  
808 Crespo M, Garcia-Rodriguez C. Lipopolysaccharide and interferon-gamma team up to  
809 activate HIF-1alpha via STAT1 in normoxia and exhibit sex differences in human aortic  
810 valve interstitial cells. *Biochim Biophys Acta Mol Basis Dis*. 2019;1865:2168-2179. doi:  
811 10.1016/j.bbadis.2019.04.014
- 812 28. Jin H, St Hilaire C, Huang Y, Yang D, Dmitrieva NI, Negro A, Schwartzbeck R, Liu Y, Yu  
813 Z, Walts A, et al. Increased activity of TNAP compensates for reduced adenosine  
814 production and promotes ectopic calcification in the genetic disease ACDC. *Sci Signal*.  
815 2016;9:ra121. doi: 10.1126/scisignal.aaf9109
- 816 29. Moorhead WJ, 3rd, Chu CC, Cuevas RA, Callahan Jt, Wong R, Regan C, Boufford CK,  
817 Sur S, Liu M, Gomez D, et al. Dysregulation of FOXO1 (Forkhead Box O1 Protein)  
818 Drives Calcification in Arterial Calcification due to Deficiency of CD73 and Is Present in  
819 Peripheral Artery Disease. *Arterioscler Thromb Vasc Biol*. 2020;40:1680-1694. doi:  
820 10.1161/ATVBAHA.119.313765
- 821 30. Jung JJ, Razavian M, Kim HY, Ye Y, Golestani R, Toczek J, Zhang J, Sadeghi MM.  
822 Matrix metalloproteinase inhibitor, doxycycline and progression of calcific aortic valve  
823 disease in hyperlipidemic mice. *Sci Rep*. 2016;6:32659. doi: 10.1038/srep32659
- 824 31. Millan A, Lanzer P, Sorribas V. The Thermodynamics of Medial Vascular Calcification.  
825 *Front Cell Dev Biol*. 2021;9:633465. doi: 10.3389/fcell.2021.633465
- 826 32. Kim NW, Piatyszek MA, Prowse KR, Harley CB, West MD, Ho PL, Coviello GM, Wright  
827 WE, Weinrich SL, Shay JW. Specific association of human telomerase activity with  
828 immortal cells and cancer. *Science*. 1994;266:2011-2015. doi: 10.1126/science.7605428

- 829 33. Hao LY, Armanios M, Strong MA, Karim B, Feldser DM, Huso D, Greider CW. Short  
830 telomeres, even in the presence of telomerase, limit tissue renewal capacity. *Cell*.  
831 2005;123:1121-1131. doi: 10.1016/j.cell.2005.11.020
- 832 34. Pascolo E, Wenz C, Lingner J, Huel N, Priepke H, Kauffmann I, Garin-Chesa P, Rettig  
833 WJ, Damm K, Schnapp A. Mechanism of human telomerase inhibition by BIBR1532, a  
834 synthetic, non-nucleosidic drug candidate. *J Biol Chem*. 2002;277:15566-15572. doi:  
835 10.1074/jbc.M201266200
- 836 35. Ogawa D, Nomiya T, Nakamachi T, Heywood EB, Stone JF, Berger JP, Law RE,  
837 Bruemmer D. Activation of peroxisome proliferator-activated receptor gamma  
838 suppresses telomerase activity in vascular smooth muscle cells. *Circ Res*. 2006;98:e50-  
839 59. doi: 10.1161/01.RES.0000218271.93076.c3
- 840 36. Chiang YJ, Hemann MT, Hathcock KS, Tessarollo L, Feigenbaum L, Hahn WC, Hodes  
841 RJ. Expression of telomerase RNA template, but not telomerase reverse transcriptase,  
842 is limiting for telomere length maintenance in vivo. *Mol Cell Biol*. 2004;24:7024-7031.  
843 doi: 10.1128/MCB.24.16.7024-7031.2004
- 844 37. Ghosh A, Saginc G, Leow SC, Khattar E, Shin EM, Yan TD, Wong M, Zhang Z, Li G,  
845 Sung WK, et al. Telomerase directly regulates NF-kappaB-dependent transcription. *Nat*  
846 *Cell Biol*. 2012;14:1270-1281. doi: 10.1038/ncb2621
- 847 38. Liu N, Ding D, Hao W, Yang F, Wu X, Wang M, Xu X, Ju Z, Liu JP, Song Z, et al. hTERT  
848 promotes tumor angiogenesis by activating VEGF via interactions with the Sp1  
849 transcription factor. *Nucleic Acids Res*. 2016;44:8693-8703. doi: 10.1093/nar/gkw549
- 850 39. Lee C, Huang CH. LASAGNA: a novel algorithm for transcription factor binding site  
851 alignment. *BMC Bioinformatics*. 2013;14:108. doi: 10.1186/1471-2105-14-108
- 852 40. Wingender E, Dietze P, Karas H, Knuppel R. TRANSFAC: a database on transcription  
853 factors and their DNA binding sites. *Nucleic Acids Res*. 1996;24:238-241. doi:  
854 10.1093/nar/24.1.238
- 855 41. Okutani Y, Kitanaka A, Tanaka T, Kamano H, Ohnishi H, Kubota Y, Ishida T, Takahara  
856 J. Src directly tyrosine-phosphorylates STAT5 on its activation site and is involved in  
857 erythropoietin-induced signaling pathway. *Oncogene*. 2001;20:6643-6650. doi:  
858 10.1038/sj.onc.1204807
- 859 42. Natarajan K, Muller-Klieser D, Rubner S, Berg T. Stafia-1: a STAT5a-Selective Inhibitor  
860 Developed via Docking-Based Screening of in Silico O-Phosphorylated Fragments.  
861 *Chemistry*. 2020;26:148-154. doi: 10.1002/chem.201904147

- 862 43. Elumalai N, Berg A, Natarajan K, Scharow A, Berg T. Nanomolar inhibitors of the  
863 transcription factor STAT5b with high selectivity over STAT5a. *Angew Chem Int Ed Engl.*  
864 2015;54:4758-4763. doi: 10.1002/anie.201410672
- 865 44. Leopold JA. Cellular mechanisms of aortic valve calcification. *Circ Cardiovasc Interv.*  
866 2012;5:605-614. doi: 10.1161/CIRCINTERVENTIONS.112.971028
- 867 45. Babu AN, Meng X, Zou N, Yang X, Wang M, Song Y, Cleveland JC, Weyant M,  
868 Banerjee A, Fullerton DA. Lipopolysaccharide stimulation of human aortic valve  
869 interstitial cells activates inflammation and osteogenesis. *Ann Thorac Surg.* 2008;86:71-  
870 76. doi: 10.1016/j.athoracsur.2008.03.008
- 871 46. Gizard F, Nomiya T, Zhao Y, Findeisen HM, Heywood EB, Jones KL, Staels B,  
872 Bruemmer D. The PPARalpha/p16INK4a pathway inhibits vascular smooth muscle cell  
873 proliferation by repressing cell cycle-dependent telomerase activation. *Circ Res.*  
874 2008;103:1155-1163. doi: 10.1161/CIRCRESAHA.108.186205
- 875 47. Maida Y, Yasukawa M, Okamoto N, Ohka S, Kinoshita K, Totoki Y, Ito TK, Minamino T,  
876 Nakamura H, Yamaguchi S, et al. Involvement of telomerase reverse transcriptase in  
877 heterochromatin maintenance. *Mol Cell Biol.* 2014;34:1576-1593. doi:  
878 10.1128/MCB.00093-14
- 879 48. Okamoto N, Yasukawa M, Nguyen C, Kasim V, Maida Y, Possemato R, Shibata T, Ligon  
880 KL, Fukami K, Hahn WC, et al. Maintenance of tumor initiating cells of defined genetic  
881 composition by nucleostemin. *Proc Natl Acad Sci U S A.* 2011;108:20388-20393. doi:  
882 10.1073/pnas.1015171108
- 883 49. Slagboom PE, Droog S, Boomsma DI. Genetic determination of telomere size in  
884 humans: a twin study of three age groups. *Am J Hum Genet.* 1994;55:876-882.
- 885 50. Brouillette S, Singh RK, Thompson JR, Goodall AH, Samani NJ. White cell telomere  
886 length and risk of premature myocardial infarction. *Arterioscler Thromb Vasc Biol.*  
887 2003;23:842-846. doi: 10.1161/01.ATV.0000067426.96344.32
- 888 51. Samani NJ, Boulby R, Butler R, Thompson JR, Goodall AH. Telomere shortening in  
889 atherosclerosis. *Lancet.* 2001;358:472-473. doi: 10.1016/S0140-6736(01)05633-1
- 890 52. Kurz DJ, Kloeckener-Gruissem B, Akhmedov A, Eberli FR, Buhler I, Berger W, Bertel O,  
891 Luscher TF. Degenerative aortic valve stenosis, but not coronary disease, is associated  
892 with shorter telomere length in the elderly. *Arterioscler Thromb Vasc Biol.* 2006;26:e114-  
893 117. doi: 10.1161/01.ATV.0000222961.24912.69

- 894 53. Huzen J, Peeters W, de Boer RA, Moll FL, Wong LS, Codd V, de Kleijn DP, de Smet BJ,  
895 van Veldhuisen DJ, Samani NJ, et al. Circulating leukocyte and carotid atherosclerotic  
896 plaque telomere length: interrelation, association with plaque characteristics, and  
897 restenosis after endarterectomy. *Arterioscler Thromb Vasc Biol.* 2011;31:1219-1225. doi:  
898 10.1161/ATVBAHA.110.217158
- 899 54. Hoerstrup SP, Kadner A, Melnitchouk S, Trojan A, Eid K, Tracy J, Sodian R, Visjager JF,  
900 Kolb SA, Grunenfelder J, et al. Tissue engineering of functional trileaflet heart valves  
901 from human marrow stromal cells. *Circulation.* 2002;106:1143-150.
- 902 55. Hortells L, Sur S, St Hilaire C. Cell Phenotype Transitions in Cardiovascular  
903 Calcification. *Front Cardiovasc Med.* 2018;5:27. doi: 10.3389/fcvm.2018.00027
- 904 56. Bogdanova M, Zabirnyk A, Malashicheva A, Enayati KZ, Karlsen TA, Kaljusto ML,  
905 Kvitting JP, Dissen E, Sullivan GJ, Kostareva A, et al. Interstitial cells in calcified aortic  
906 valves have reduced differentiation potential and stem cell-like properties. *Sci Rep.*  
907 2019;9:12934. doi: 10.1038/s41598-019-49016-0
- 908 57. Lin ME, Chen T, Leaf EM, Speer MY, Giachelli CM. Runx2 Expression in Smooth  
909 Muscle Cells Is Required for Arterial Medial Calcification in Mice. *Am J Pathol.*  
910 2015;185:1958-1969. doi: 10.1016/j.ajpath.2015.03.020
- 911 58. Xu K, Xie S, Huang Y, Zhou T, Liu M, Zhu P, Wang C, Shi J, Li F, Sellke FW, et al. Cell-  
912 Type Transcriptome Atlas of Human Aortic Valves Reveal Cell Heterogeneity and  
913 Endothelial to Mesenchymal Transition Involved in Calcific Aortic Valve Disease.  
914 *Arterioscler Thromb Vasc Biol.* 2020;40:2910-2921. doi: 10.1161/ATVBAHA.120.314789
- 915 59. Joung YH, Lim EJ, Darvin P, Chung SC, Jang JW, Do Park K, Lee HK, Kim HS, Park T,  
916 Yang YM. MSM enhances GH signaling via the Jak2/STAT5b pathway in osteoblast-like  
917 cells and osteoblast differentiation through the activation of STAT5b in MSCs. *PLoS*  
918 *One.* 2012;7:e47477. doi: 10.1371/journal.pone.0047477
- 919 60. Lee KM, Park KH, Hwang JS, Lee M, Yoon DS, Ryu HA, Jung HS, Park KW, Kim J,  
920 Park SW, et al. Inhibition of STAT5A promotes osteogenesis by DLX5 regulation. *Cell*  
921 *Death Dis.* 2018;9:1136. doi: 10.1038/s41419-018-1184-7
- 922 61. Paulson M, Pisharody S, Pan L, Guadagno S, Mui AL, Levy DE. Stat protein  
923 transactivation domains recruit p300/CBP through widely divergent sequences. *J Biol*  
924 *Chem.* 1999;274:25343-25349. doi: 10.1074/jbc.274.36.25343

- 925 62. Martino A, Holmes JHt, Lord JD, Moon JJ, Nelson BH. Stat5 and Sp1 regulate  
926 transcription of the cyclin D2 gene in response to IL-2. *J Immunol.* 2001;166:1723-1729.  
927 doi: 10.4049/jimmunol.166.3.1723
- 928 63. Bergad PL, Towle HC, Berry SA. Yin-yang 1 and glucocorticoid receptor participate in  
929 the Stat5-mediated growth hormone response of the serine protease inhibitor 2.1 gene.  
930 *J Biol Chem.* 2000;275:8114-8120. doi: 10.1074/jbc.275.11.8114
- 931 64. Yamada O, Ozaki K, Furukawa T, Machida M, Wang YH, Motoji T, Mitsuishi T, Akiyama  
932 M, Yamada H, Kawauchi K, et al. Activation of STAT5 confers imatinib resistance on  
933 leukemic cells through the transcription of TERT and MDR1. *Cell Signal.* 2011;23:1119-  
934 1127. doi: 10.1016/j.cellsig.2011.02.005
- 935 65. Yamada O, Ozaki K, Akiyama M, Kawauchi K. JAK-STAT and JAK-PI3K-mTORC1  
936 pathways regulate telomerase transcriptionally and posttranslationally in ATL cells. *Mol*  
937 *Cancer Ther.* 2012;11:1112-1121. doi: 10.1158/1535-7163.MCT-11-0850
- 938 66. Tormo AJ, Letellier MC, Sharma M, Elson G, Crabe S, Gauchat JF. IL-6 activates  
939 STAT5 in T cells. *Cytokine.* 2012;60:575-582. doi: 10.1016/j.cyto.2012.07.002
- 940 67. Tanabe Y, Nishibori T, Su L, Arduini RM, Baker DP, David M. Cutting edge: role of  
941 STAT1, STAT3, and STAT5 in IFN-alpha beta responses in T lymphocytes. *J Immunol.*  
942 2005;174:609-613. doi: 10.4049/jimmunol.174.2.609
- 943 68. Honda S, Miyamoto T, Watanabe T, Narumi T, Kadowaki S, Honda Y, Otaki Y,  
944 Hasegawa H, Netsu S, Funayama A, et al. A novel mouse model of aortic valve stenosis  
945 induced by direct wire injury. *Arterioscler Thromb Vasc Biol.* 2014;34:270-278. doi:  
946 10.1161/ATVBAHA.113.302610
- 947 69. Sider KL, Blaser MC, Simmons CA. Animal models of calcific aortic valve disease. *Int J*  
948 *Inflam.* 2011;2011:364310. doi: 10.4061/2011/364310
- 949 70. Balani K, Brito FC, Kos L, Agarwal A. Melanocyte pigmentation stiffens murine cardiac  
950 tricuspid valve leaflet. *J R Soc Interface.* 2009;6:1097-1102. doi: 10.1098/rsif.2009.0174
- 951 71. Carneiro F, Kruithof BP, Balani K, Agarwal A, Gaussin V, Kos L. Relationships between  
952 melanocytes, mechanical properties and extracellular matrix composition in mouse heart  
953 valves. *J Long Term Eff Med Implants.* 2015;25:17-26. doi:  
954 10.1615/jlongtermeffmedimplants.2015011748
- 955 72. Mjaatvedt CH, Kern CB, Norris RA, Fairey S, Cave CL. Normal distribution of  
956 melanocytes in the mouse heart. *Anat Rec A Discov Mol Cell Evol Biol.* 2005;285:748-  
957 757. doi: 10.1002/ar.a.20210

- 958 73. Dharmarajan S, Speer MY, Pierce K, Lally J, Leaf EM, Lin ME, Scatena M, Giachelli CM.  
959 Role of Runx2 in Calcific Aortic Valve Disease in Mouse Models. *Front Cardiovasc Med*.  
960 2021;8:687210. doi: 10.3389/fcvm.2021.687210  
961

1 **SUPPLEMENTAL MATERIAL**

2

3 **Non-canonical Telomerase Reverse Transcriptase Controls Osteogenic Differentiation of**  
4 **Aortic Valve Cells Through STAT5**

5

6 Rolando A. Cuevas<sup>1</sup>, Luis Hortells<sup>1,2</sup>, Claire C. Chu<sup>1</sup>, Ryan Wong<sup>1</sup>, Alex Crane<sup>1</sup>, Camille  
7 Boufford<sup>1</sup>, Cailyn Regan<sup>1</sup>, William J. Moorhead III<sup>1</sup>, Michael J. Bashline<sup>1</sup>, Aneesha Parwal<sup>1</sup>,  
8 Angelina M. Parise<sup>1</sup>, Aditi Gurkar<sup>3</sup>, Dennis Bruemmer<sup>4</sup>, John Sembrat<sup>5</sup>, Ibrahim Sultan<sup>6</sup>,  
9 Thomas G. Gleason<sup>7</sup>, Marie Billaud<sup>8</sup>, and Cynthia St. Hilaire<sup>1,9\*</sup>

10

11 <sup>1</sup> Division of Cardiology, Department of Medicine, Pittsburgh Heart, Lung, Blood and Vascular  
12 Medicine Institute, University of Pittsburgh, Pittsburgh, Pennsylvania, USA.

13 <sup>2</sup> current address - Institute for Experimental Cardiovascular Medicine, University Heart Centre  
14 Freiburg–Bad Krozingen, Medical Center and Faculty of Medicine, University of Freiburg,  
15 Freiburg, Germany.

16 <sup>3</sup> Aging Institute, Division of Geriatrics, Department of Medicine, University of Pittsburgh,  
17 Pittsburgh, Pennsylvania, USA.

18 <sup>4</sup> Department of Cardiovascular Medicine, Cleveland Clinic, Cleveland, OH, USA.

19 <sup>5</sup> Division of Pulmonary, Allergy, and Critical Care Medicine, University of Pittsburgh School of  
20 Medicine, Pittsburgh, PA, USA.

21 <sup>6</sup> Division of Cardiac Surgery, Department of Cardiothoracic Surgery, Heart and Vascular  
22 Institute, University of Pittsburgh Medical Center, Pittsburgh, Pennsylvania, USA.

23 <sup>7</sup> Division of Cardiac Surgery, Univ. of Maryland School of Medicine, Baltimore, MD, USA.

24 <sup>8</sup> Department of Surgery, Division of Cardiac Surgery, Brigham and Women's Hospital &  
25 Harvard Medical School, Boston, Maryland, USA.

26 <sup>9</sup> Department of Bioengineering, University of Pittsburgh, Pittsburgh, Pennsylvania, USA.

27

28 Running Title: TERT/STAT5 is required for cardiovascular calcification

29

30 \*Corresponding Author Contact Info:

31 Cynthia St. Hilaire, PhD, FAHA

32 University of Pittsburgh

33 BSTWR 1744.1

34 200 Lothrop Street, Pittsburgh, PA 15261

35 +1 412-648-9441 sthilaire@pitt.edu

36

37 \*Corresponding Author Contact Info:

38 Cynthia St. Hilaire, PhD, FAHA

39 University of Pittsburgh

40 BSTWR 1744.1

41 200 Lothrop Street, Pittsburgh, PA 15261

42 +1 412-648-9441 sthilaire@pitt.edu

43



44

## 45 **METHODS**

### 46 **Availability of Materials**

47 We abide by the NIH Grants Policy on Sharing of Unique Research Resources, including the  
48 NIH Policy on Sharing of Model Organisms for Biomedical Research (2004), NIH Grants Policy  
49 Statement (2003), and Sharing of Biomedical Research Resources: Principles and Guidelines  
50 for Recipients of NIH Grants and Contracts (1999), and the Bayh-Dole Act and the Technology  
51 Transfer Commercialization Act of 2000. De-identified human cell lines and tissues generated in  
52 our laboratory will be made available for non-commercial research per established University of  
53 Pittsburgh Office of Research IRB and MTA protocols.

54

### 55 **Ethics**

56 Human aortic valves were collected from subjects enrolled in studies approved by the institutional  
57 review board (IRB) of the University of Pittsburgh per the Declaration of Helsinki. No bicuspid  
58 valves were used in this study. Mice used for the generation of cell lines were given veterinary  
59 care by the University of Pittsburgh Division of Laboratory Animal Resources which adheres to  
60 the NIH policy on the Animal Welfare Act and all other applicable laws. Facilities are under the  
61 full-time supervision of veterinarians and are AAALAC-accredited. Our protocols follow the AVMA  
62 Guidelines on Euthanasia. All animal use was approved by the Institutional Animal Care and Use  
63 Committee at the University of Pittsburgh.

64

### 65 **Human Tissue Collection and Isolation**

66 Surgical specimens from humans were collected from subjects who consented and enrolled in  
67 studies approved by the institutional review board (IRB) of the University of Pittsburgh per the

68 Declaration of Helsinki. Personnel involved with specimen handling underwent extensive  
69 institutional training. Cadaveric tissues obtained via the Center for Organ Recovery and  
70 Education (CORE) were approved by the University of Pittsburgh Committee for Oversight of  
71 Research and Clinical Training Involving Decedents (CORID). A detailed protocol describing  
72 tissue collection handling was published previously.<sup>1</sup> Briefly, valves were collected from valve  
73 replacement surgeries or recovered from cadaveric organs and stored in cold Belzer UW Cold  
74 Storage Transplant Solution (Bridge to Life) at 4°C for transporting. Aortic roots were excised  
75 and washed with a sterile rinsing solution (sterile PBS supplemented with 2.5 µg/mL of  
76 fungicide, 0.05 mg/mL of gentamicin, and 5 µg/mL of bactericide). Leaflets were unbiasedly  
77 selected for VIC isolation, Von Kossa staining for calcification, and snap freezing for RNA  
78 collection. Tissues were processed as close as possible to the time of extraction to guarantee  
79 the best yield of cell recovery.

80

### 81 **Human Cell Isolation**

82 We established patient-specific lines by using the same valves for histopathology, RNA, and cell  
83 isolation. Human primary aortic valve interstitial cell (VIC) lines were generated from male and  
84 female subjects as previously described.<sup>2</sup> Briefly, leaflets were washed with PBS containing 10  
85 mg/ml gentamicin (GIBCO) and 250 µg/ml fungizone (GIBCO) and dissociated with 0.1%  
86 collagenase II at 37 C and 5% of CO<sub>2</sub> for 18 hours. Then, the tissue was further dissociated by  
87 gently mixing it by pipetting with a serological pipette to ensure the release of AVICs and then  
88 passed through a 0.70 µm filter to remove debris. Cells were pelleted and then resuspended in  
89 Dulbecco's Modified Eagle's Medium (DMEM) supplemented with 10% fetal bovine serum (FBS)  
90 and 1X penicillin-streptomycin (P/S). Human coronary artery smooth muscle cells (CASMC)  
91 were obtained from the patient coronary as previously described.<sup>3</sup> Briefly, vessels were washed

92 with PBS containing 10 mg/ml gentamicin (GIBCO) and 250 µg/ml fungizone (GIBCO). Vessels  
93 were cut open to expose the lumen and intima and adventitia were gently scrapped. Vessels  
94 were then sectioned and dissociated with 0.1% collagenase II for 3 hrs. Cells were pelleted and  
95 then seeded and expanded.

96

## 97 **Cell Culture**

98 VIC lines were expanded in Dulbecco's Modified Eagle's Medium supplemented with 10% fetal  
99 bovine serum and 1X penicillin-streptomycin. Cells were used between passages 4 and 15.

100 Growth media was changed every three days, and cells were split 1:2 when confluent. Human  
101 coronary artery smooth muscle cell (CASMC) lines were expanded in smooth muscle media  
102 SMGM (CC-3181) supplemented with BULLETKIT (CC-4149). Human mesenchymal stem cells  
103 (MSCs, PT-2501, Lonza) were expanded on Minimum Essential Medium alpha without  
104 nucleosides and supplemented with 10% fetal bovine serum and 1X penicillin-streptomycin and  
105 used between passages 4 and 10. Cells are routinely tested for mycoplasma contamination.

106

## 107 **Osteogenic Assay**

108 For osteogenic experiments, 250,000 cells per 9.5 cm<sup>2</sup> were seeded and treated with  
109 osteogenic media (Gibco Minimum Essential Medium alpha with nucleosides, 10% FBS, 1X  
110 P/S, 10 mM glycerol phosphate, 50 µM ascorbic acid 2-phosphate, and 100 nM  
111 dexamethasone).<sup>4</sup> No treatment media consisted of Gibco Minimum Essential Medium alpha  
112 with nucleosides, 10% FBS, 1X P/S. Media was replaced every four days and prepared fresh  
113 every time. BiBR1532 (2981, Tocris) was added to the media at 1, 10, or 100 nM every two  
114 days during the OST treatment.<sup>5</sup> Inhibitors StafiA-1 and StafiB-1 (Sigma-Aldrich) were used at  
115 10 µM and added every two days for the duration of the OST treatment. For inflammatory

116 assays, we used 2.5 µg/mL of LPS from Escherichia coli O111:B4 (Sigma-Aldrich) every two  
117 days for the duration of the OST treatment.

118

### 119 **SDS-Page and Immunoblotting**

120 Cells were lysed in lysis buffer (1% CHAPS hydrate, 150 mM sodium chloride, 25 mM HEPES  
121 buffer), supplemented with 1x protease and phosphatase inhibitor cocktail (Sigma-Aldrich).  
122 Cells were scraped and transferred into microcentrifuge tubes, vortexed for 10 minutes,  
123 freeze/thawed for 5 cycles, then centrifuged at 12,000 x g for 10 minutes at 4°C, and  
124 supernatants were collected. Proteins were separated with TGX 4-20% stain-free  
125 polyacrylamide gel (Bio-Rad) in 1x Tris/Glycine/SDS buffer (Bio-Rad) and transferred to 0.2 µm  
126 nitrocellulose (1620112, Bio-Rad) membrane in 1x Trans-Blot Turbo Transfer Buffer (Bio-Rad)  
127 using the Trans-Blot Turbo Transfer System (Bio-Rad) according to the manufacturer  
128 recommendations. The membranes were blocked in Odyssey blocking buffer (PBS) (LI-COR)  
129 and immunoblotted overnight with primary antibodies against TERT (600-401-252, Rockland),  
130 STAT5 (9420S, Cell Signaling), RUNX2 (ab192256, Abcam), MYH11(MAB20221, Abnova),  
131 OPN (AF808, R&D systems), αSMA (ab5494, Abcam), TNAP (MAB2909, R&D systems), α-  
132 tubulin (926-42213, LI-COR), followed by secondary anti-rabbit or anti-mouse IgG antibody  
133 (926-68070, 926-68021, 926-32211, LI-COR). Primary and secondary antibodies were diluted in  
134 Odyssey blocking buffer with 0.1% Tween 20. Membranes were washed in PBS with 0.1%  
135 Tween 20. Immunofluorescence signals were detected with the Odyssey CLx system (LI-COR),  
136 and images were analyzed with Image Studio (Version 5.2, LI-COR).

137

### 138 **Immunofluorescent Staining on Fixed Cells**

139 Cells were washed with PBS and then fixed with 4% paraformaldehyde (Electron Microscopy  
140 Sciences) for 15 minutes at room temperature, followed by 10 minutes of permeabilization with

141 TRITON X-100 0.5% (Fisher Scientific). Cells were incubated at room temperature for 1 hour in  
142 blocking buffer (PBS, 0.5% Triton-X 100, 5% FBS). Primary antibodies were diluted in the  
143 blocking solution and then incubated overnight at 4°C. Next, cells were washed three times for  
144 five minutes each with PBS containing 0.1% TWEEN. Fluorescent secondary antibodies were  
145 diluted in blocking solution and incubated for one hour protected from the light, then washed  
146 three times for five minutes each with PBS, 0.1% TWEEN 20 with a final wash in PBS.  
147 Specimens were finally mounted with Fluoroshield Mounting Medium with DAPI (Abcam) and  
148 imaged within 24 hours. F-Actin was stained with AlexaFluor488 Phalloidin (Molecular Probes)  
149 for 30 minutes, then washed with PBS before mounting. Calcium accumulation was determined  
150 with OsteoImage (Lonza) following the manufacturer's recommendations.

151

### 152 **Immunofluorescent Staining on Paraffin Sections**

153 Human specimens embedded in paraffin were warmed to 65°C and deparaffinized using xylene  
154 and graded alcohol baths, rehydrated in distilled H<sub>2</sub>O, and boiled for 20 minutes in antigen  
155 unmasking solution (Vector Labs). Cooled samples were then washed with PBS for five  
156 minutes. Specimens were then blocked with PBS containing 3% fish skin gelatin and 10% horse  
157 serum for one hour. Primary antibodies were diluted in the blocking solution and then incubated  
158 overnight at 4°C. Next, specimens were washed three times for five minutes each with PBS  
159 containing 3% fish skin gelatin and 0.1% TWEEN 20. Fluorescent secondary antibodies were  
160 diluted in a blocking solution and incubated for one hour protected from the light, then washed  
161 three times for five minutes each. Specimens were finally mounted with Fluoroshield Mounting  
162 Medium with DAPI (Abcam) and imaged within 24 hours.

163

### 164 **Alizarin Red Staining and Quantification**

165 Cells were washed with PBS and then fixed with 4% paraformaldehyde (Electron Microscopy  
166 Sciences) for 15 minutes at room temperature, followed by two washes with deionized water.  
167 Fixed cells were then covered with 40 mM Alizarin Red S (Sigma-Aldrich) at pH 4.1 – 4.3 and  
168 gently rocked for 20 minutes at room temperature. Cells were then washed twice with deionized  
169 water to remove any unincorporated dye. After imaging, Alizarin Red S was extracted with 10%  
170 (v/v) acetic acid (Fisher Scientific) for 30 minutes, scraped into a microcentrifuge tube, vortexed,  
171 and then incubated at 85°C for 10 minutes. After chilling on ice for 5 minutes, the mixture was  
172 centrifuged at 20,000 x g for 15 minutes at 4°C. 500 µl of supernatant was transferred to a new  
173 tube, and 10% (v/v) ammonium hydroxide (Fisher Scientific) was then added to the supernatant.  
174 Absorbance was at 405 nm using a 96-well plate spectrophotometer.

175

#### 176 **Von Kossa Staining**

177 Human specimens embedded in paraffin were warmed to 65°C for one hour and then  
178 deparaffinized through xylene and graded alcohol incubations. Specimens were then  
179 rehydrated in distilled water. Specimens were stained using the Von Kossa Method of Calcium  
180 Kit (Polysciences, 24633-1) following the manufacturer's instructions.

181

#### 182 **Lentiviral Production and Cell Infection**

183 Lentiviruses were produced by transfecting Dharmacon SMARTvector Lentiviral plasmids  
184 encoding shTERT TurboGFP (V3SH11240-225610522) or SMARTvector Non-targeting Control  
185 (VSC11707) into HEK293T cells following manufacturer recommendations. The viral-containing  
186 supernatant was collected at 48h after transfection, filtered through a 0.45-µm filter, and stored  
187 at -80C. Human VICs, CASMCs, and MSCs lines were transduced with MOI of 5 in the  
188 presence of 0.8 µg ml<sup>-1</sup> polybrene (Millipore) to enhance transduction efficiency.

189

## 190 **Transcriptional Analysis**

191 Tissue RNA was isolated using Trizol (Life Technologies). Cell RNA was isolated using Quick-  
192 RNA MiniPrep (Zymo Research). RNA was treated with DNase I (Zymo Research) in  
193 accordance with the manufacturer's instructions. Reverse transcription was performed using  
194 MultiScribe Reverse Transcriptase system (Applied Biosystems). Sixteen ng of cDNA was used  
195 per reaction. qPCR was performed on a CFX Connect Real-Time System (Bio-Rad) using  
196 PowerUP SYBR Green Master Mix (Applied Biosystems) as follows: one cycle at 95 °C  
197 (10 minutes) and 40 cycles of 95 °C (20 seconds) and 58 °C (20 seconds) and 72 °C (1 minutes).  
198 *GAPDH* or *18s* expression were used to normalize expression. Relative expression was  
199 calculated using the average threshold cycle number and the  $2^{(Ct(\textit{housekeeping gene}) - Ct(\textit{target gene}))}$   
200 formula. Primers are listed in Supplementary Table 1.

201

## 202 **Telomere Length Analysis**

203 Tissue and AVICs genomic DNA was isolated from passage 1 using DirectAmp Tissue Genomic  
204 DNA Amplification Kit (Denville Scientific). Telomere length was analyzed using real-time PCR  
205 as previously described.<sup>6</sup> Briefly, genomic DNA was isolated following standard protocol, and 10  
206 ng of gDNA per reaction was utilized. Samples were run in triplicate with 35 ng of DNA per  
207 reaction, and telomere repeats were amplified using PowerUP SYBR Green Master Mix  
208 (Thermofisher Scientific) on a CFX Connect Real-Time PCR System (Bio-Rad). Repeated  
209 amplification data were normalized to *RPLP0/36b4* as a single copy-gene. Primers are listed in  
210 Supplementary Table 1.

211

## 212 **Proliferation Assays**

213 Cell proliferation was evaluated using Trypan Blue incorporation in an automatized cell counter  
214 Countess II FL (Invitrogen). Briefly, cells were grown on alpha-MEM supplemented with 10% of

215 FBS and penicillin and streptomycin cocktail (GIBCO) for the duration of the assay. Growth was  
216 quantified twice a week. Cell number during OST treatment was determined at the beginning  
217 and end of the assay.

218

### 219 **Senescence-Associated $\beta$ -Galactosidase Assays**

220 Cellular senescence was evaluated by senescence-associated  $\beta$ -Galactosidase (SA- $\beta$ -Gal)  
221 activity assay. Briefly, cells were washed with PBS and then fixed with 4% paraformaldehyde  
222 (Electron Microscopy Sciences) for 5 minutes at room temperature and then washed twice with  
223 PBS. Next, cells were incubated in X-Gal Solution Mix containing 1 mg/mL of 5-Bromo-4-  
224 Chloro-3-Indolyl-Alpha-D-Galactopyranoside (American Bioanalytical), 40 mM Sodium  
225 Phosphate monobasic solution (Sigma-Aldrich), 40 mM Sodium Phosphate Dibasic solution  
226 (Sigma-Aldrich), 40 mM Citric Acid (Sigma-Aldrich), 5 mM Potassium Ferrocyanide (Sigma-  
227 Aldrich), 5 mM Potassium Ferricyanide (Sigma-Aldrich), 150 mM NaCl<sub>2</sub>, and 2 mM MgCl<sub>2</sub>, pH  
228 6.0, for 16 hours at 37°C without CO<sub>2</sub> to develop blue color. Then, cells were washed twice with  
229 PBS, and SA- $\beta$ -gal positive cells were imaged and calculated based on randomly selected  
230 bright fields areas containing at least 200 cells per field as revealed by subsequent DAPI  
231 staining.

232

### 233 **Cell Migration Assays**

234 AVICs were seeded in a 12-well plate at a concentration of 1x10<sup>5</sup> cells per well and were left  
235 until they reached 90% of confluence. The well surface was scratched with a 200  $\mu$ l sterile  
236 pipette tip and washed with PBS to remove detached cells. Horizontal lines were drawn on the  
237 bottom outside of the well and used as a reference for alignment to obtain the same field for  
238 each image acquisition run. VICs media was added, and images were collected at different time  
239 points with a phase-contrast microscope using the horizontal lines as reference marks. Scratch



240 area and scratch width were determined with the Wound Healing Size Macro Tool using  
241 ImageJ.<sup>7</sup> Linear regression and two-way ANOVA to compare the changes in the area and the  
242 average length of the scratch.

243

#### 244 **Chromatin Immunoprecipitation**

245 Chromatin Immunoprecipitation (ChIP) was performed on cultured cells as previously  
246 described.<sup>8</sup> Briefly, AVICs were stimulated with osteogenic media for 14 days and then collected  
247 in 20 mM Na-butyrate dissolved in PBS, and cross-linking of DNA and proteins was performed  
248 with formaldehyde (1% vol/vol final concentration) at room temperature. Cross-linking was  
249 stopped with 125 mM glycine for 10 min. Cross-linked chromatin was sonicated to obtain  
250 fragments between 250 and 750 base pairs in a Bioruptor Pico sonication device (Diagenode).  
251 The sheared chromatin was immunoprecipitated with 1 ug of antibody raised against TERT  
252 (Rockland, 600-401-252S) and 0.3 ug STAT5 (Cell Signaling, 94205S). Normal rabbit polyclonal  
253 IgG (Cell Signaling, 2729S) was used as a negative control. Negative control was incubated  
254 with rabbit IgG and input DNA primary antibody. Chromatin complexes were recovered with  
255 ChIP-grade Protein G magnetic beads (9006S, Cell Signaling). DNA was recovered with  
256 standard phenol-chloroform extraction. Immunoprecipitated DNA was amplified by quantitative  
257 RT-PCR using SYBR green. ChIP primers are listed in Supplementary Table 1.

258

#### 259 **Proximity Ligation Assays (PLA)**

260 PLA was performed directly after cell fixation and according to manufacturer instructions. Briefly,  
261 cells were blocked with Duolink blocking solution for 60 minutes at 37°C. Samples were then  
262 incubated with rabbit TERT (Rockland) and mouse STAT5 (Santa Cruz) antibodies diluted in  
263 Duolink Blocking Solution and incubated overnight at 4°C. Samples were then incubated with  
264 secondary antibodies conjugated with PLA probes (DUO92002, DUO92004, Sigma) for 2 h at

265 37°C in a humidity chamber followed by probe ligation for 30 minutes at 37°C as recommended  
266 by the manufacturer. Amplification was performed with Duolink detection kit Red 595 nm for 100  
267 minutes at 37°C (DUO92101, Sigma). Samples were mounted in DAPI-containing mounting  
268 media and prepared for image acquisition.

269

## 270 **Murine cell isolation**

271 *Tert* knockout mice (Jackson Labs, 005423) were bred with wild-type mice (Jackson Labs,  
272 000664) to produce *Tert* heterozygous mice, which were then bred to each other to yield *Tert*  
273 knockout mice and wild-type littermate controls. Het-het breeding ensures telomeres are intact.  
274 Mouse BMMSCs were isolated from femurs and tibias were dissected from three-month-old  
275 knockout or wild-type mice. The marrow was rinsed out of the bones with MSC media, and cells  
276 were plated and expanded as described previously.<sup>9</sup> Mouse AVICs were isolated from hearts of  
277 three-month-old *Tert* knockout or wild-type mice were removed, dissected, and valve leaflet  
278 removed. Cells were isolated and expanded as described previously.<sup>10</sup> Mice were given  
279 veterinary care by the University of Pittsburgh Division of Laboratory Animal Resources, which  
280 adheres to the NIH policy on the Animal Welfare Act and all other applicable laws. Facilities are  
281 under the full-time supervision of veterinarians and are AAALAC-accredited. Our protocols  
282 follow the AVMA Guidelines on Euthanasia. All animal breeding and isolations were approved  
283 by the Institutional Animal Care and Use Committee at the University of Pittsburgh. We made  
284 attempts to minimize the number of mice required to complete experiments.

285

## 286 **Promoter Analysis**

287 The upstream region of the *RUNX2* (NM\_001015051.3) promoter was scanned with LASAGNA<sup>11</sup>  
288 and TRANSFAC/MATCH<sup>12</sup> suites. Searches were carried out with data version 2021.3, high

289 quality matrices and cut off to minimize false positives hits. STAT5 logo analysis was performed  
290 with WebLogo ([weblogo.berkeley.edu](http://weblogo.berkeley.edu)).

291

## 292 **Statistics**

293 Statistical analyses were performed with GraphPad Prism 9.2 (GraphPad Software, San Diego,  
294 CA) software. All experiments used at least  $n = 3$  biological replicates and were run in technical  
295 duplicates. Statistical comparisons between the two groups were performed by a nonparametric  
296 Mann-Whitney  $U$  test. Statistical comparisons among more than two groups were performed by  
297 nonparametric Kruskal-Wallis  $H$  tests with post hoc Dunn's multiple pairwise comparisons  
298 between groups or by Two-way ANOVA. Shapiro-Wilk normality test was used. to test data  
299 distribution. Data are presented as mean  $\pm$  standard deviation (SD).

300

## 301 **REFERENCES**

- 302 1. Cuevas RA, Chu CC, Moorhead Iii WJ, Wong R, Sultan I, St. Hilaire C. Isolation of  
303 Human Primary Valve Cells for In vitro Disease Modeling. *JoVE*. 2021:e62439. doi:  
304 doi:10.3791/62439
- 305 2. Cuevas RA, Chu CC, Moorhead WJ, 3rd, Wong R, Sultan I, St Hilaire C. Isolation of  
306 Human Primary Valve Cells for In vitro Disease Modeling. *J Vis Exp*. 2021:e62439. doi:  
307 10.3791/62439
- 308 3. Gupta GK, Dhar K, Del Core MG, Hunter WJ, 3rd, Hatzoudis GI, Agrawal DK.  
309 Suppressor of cytokine signaling-3 and intimal hyperplasia in porcine coronary arteries  
310 following coronary intervention. *Exp Mol Pathol*. 2011;91:346-352. doi:  
311 10.1016/j.yexmp.2011.04.004
- 312 4. Hoemann CD, El-Gabalawy H, McKee MD. In vitro osteogenesis assays: influence of the  
313 primary cell source on alkaline phosphatase activity and mineralization. *Pathol Biol*  
314 (*Paris*). 2009;57:318-323. doi: 10.1016/j.patbio.2008.06.004
- 315 5. Pascolo E, Wenz C, Lingner J, Huel N, Priepke H, Kauffmann I, Garin-Chesa P, Rettig  
316 WJ, Damm K, Schnapp A. Mechanism of human telomerase inhibition by BIBR1532, a

- 317 synthetic, non-nucleosidic drug candidate. *J Biol Chem.* 2002;277:15566-15572. doi:  
318 10.1074/jbc.M201266200
- 319 6. Cawthon RM. Telomere measurement by quantitative PCR. *Nucleic Acids Res.*  
320 2002;30:e47. doi: 10.1093/nar/30.10.e47
- 321 7. Suarez-Arnedo A, Torres Figueroa F, Clavijo C, Arbelaez P, Cruz JC, Munoz-Camargo  
322 C. An image J plugin for the high throughput image analysis of in vitro scratch wound  
323 healing assays. *PLoS One.* 2020;15:e0232565. doi: 10.1371/journal.pone.0232565
- 324 8. Dahl JA, Collas P. A rapid micro chromatin immunoprecipitation assay (microChIP). *Nat*  
325 *Protoc.* 2008;3:1032-1045. doi: 10.1038/nprot.2008.68
- 326 9. Huang S, Xu L, Sun Y, Wu T, Wang K, Li G. An improved protocol for isolation and  
327 culture of mesenchymal stem cells from mouse bone marrow. *J Orthop Translat.*  
328 2015;3:26-33. doi: 10.1016/j.jot.2014.07.005
- 329 10. Bouchareb R, Lebeche D. Isolation of Mouse Interstitial Valve Cells to Study the  
330 Calcification of the Aortic Valve In Vitro. *J Vis Exp.* 2021. doi: 10.3791/62419
- 331 11. Lee C, Huang CH. LASAGNA: a novel algorithm for transcription factor binding site  
332 alignment. *BMC Bioinformatics.* 2013;14:108. doi: 10.1186/1471-2105-14-108
- 333 12. Wingender E, Dietze P, Karas H, Knuppel R. TRANSFAC: a database on transcription  
334 factors and their DNA binding sites. *Nucleic Acids Res.* 1996;24:238-241. doi:  
335 10.1093/nar/24.1.238
- 336

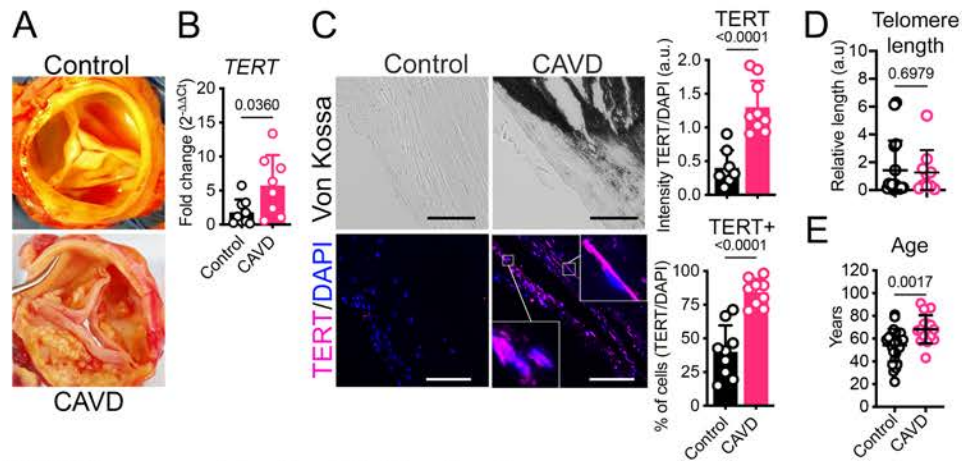

**Figure 1. TERT is upregulated in CAVD valve tissue.**

A, Surgically removed specimen of control (top) and CAVD (bottom) human valves. B, TERT mRNA transcript quantification in control and CAVD valve tissues.  $n = 8$  control,  $n = 9$  CAVD.

C, Representative serial sections of Von Kossa (dark precipitation, top panels) and TERT immunofluorescent staining (bottom panels) in control and CAVD valve tissues. Scale bar  $100 \mu\text{m}$ . Quantification of TERT intensity and the number of TERT-positive cells on the leaflet is shown on the right graphs.  $n = 9$  control,  $n = 9$  CAVD. D, Telomere length measurements in valve tissues.  $n = 16$  control,  $n = 10$  CAVD. E. Age of the patients utilized in this study.  $n = 25$  control,  $n = 16$  CAVD. Data are shown as means  $\pm$  SD.  $P$  values were calculated by the Mann-Whitney  $U$  test and shown on each graph.

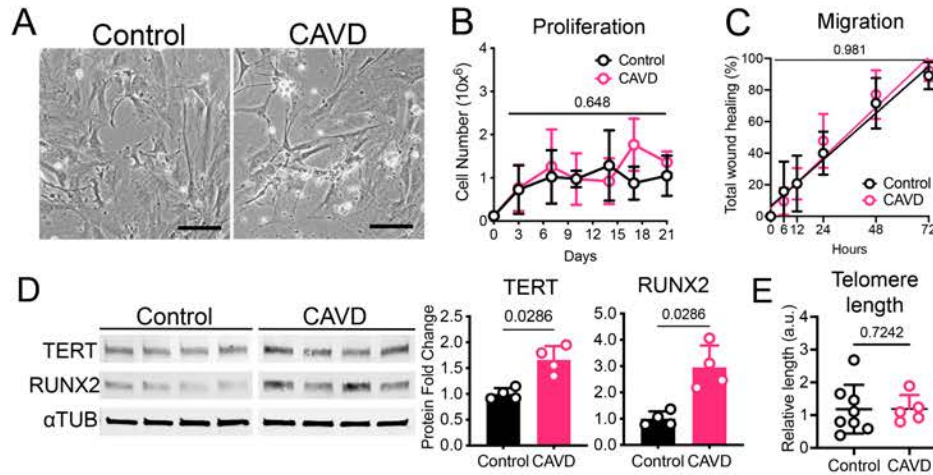

**Figure 2. Valve interstitial cells isolated from CAVD patients show elevated TERT expression at baseline.**

A, Representative images showing cell morphology of control (left) and CAVD (right) VICs. Scalebar 50  $\mu$ m. B, Proliferation of control and CAVD VICs at baseline.  $n = 3$  control,  $n = 3$  CAVD. Data represents means  $\pm$  SD. C, Relative migration distances of control and CAVD VICs.  $n = 10$  control,  $n = 10$  CAVD. Representative western blot staining of control and CAVD VICs at baseline. Quantification of protein levels is shown on the right panels.  $n = 4$  control,  $n = 4$  CAVD/. E, Telomere length measurements in VICs.  $n = 8$ , control,  $n = 5$  CAVD; means  $\pm$  SD. Data are shown as means  $\pm$  SD.  $P$  values were calculated by the Mann-Whitney  $U$  test and shown on each graph.



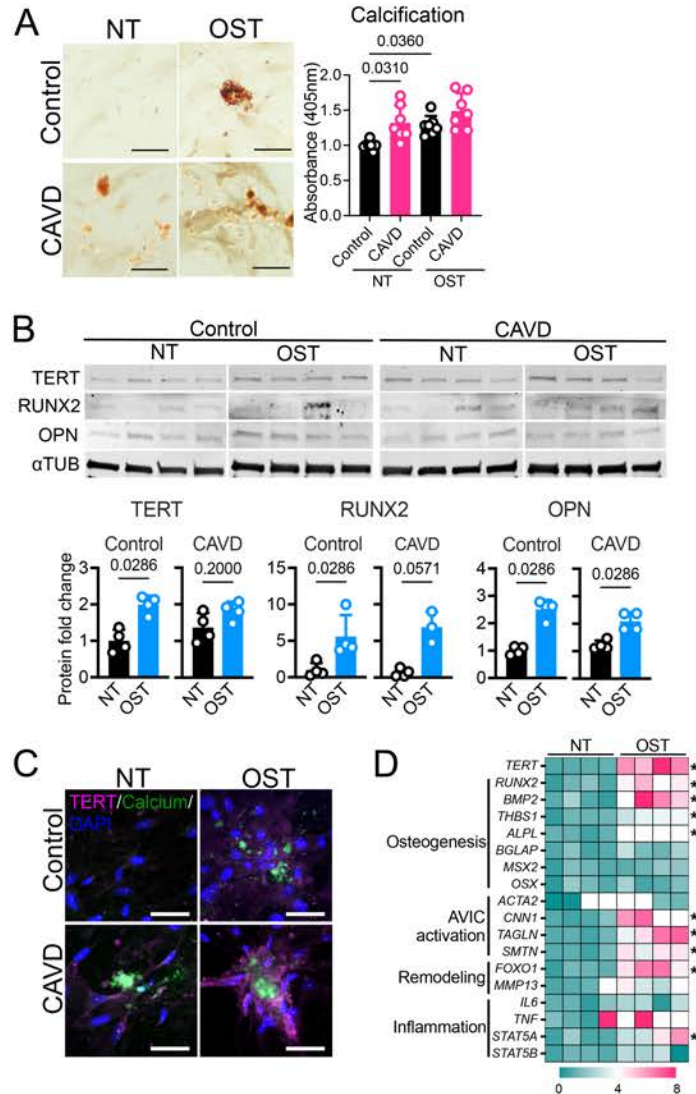

**Figure 3. TERT is upregulated during osteogenic differentiation of VICs.**

A, Representative images of VICs growing in normal conditions (no treatment, NT, left panel) or stimulated with osteogenic media (OST) for 14 days. Calcium deposition was visualized by Alizarin Red staining. Scalebar 50  $\mu$ m. Quantification of calcification is shown as average absorbance  $\pm$  SD on the right graphs.  $n = 7$  control,  $n = 7$  CAVD. B, Representative western blot staining of samples from control and CAVD VICs after 14 days of NT or OST. Quantification of protein levels is shown on the right graphs.  $n = 4$  control,  $n = 4$  CAVD. C, Representative immunofluorescent staining images of TERT in control and CAVD VICs after 14 days of NT or OST. Calcium deposition was visualized by OsteoImage staining. Scalebar 100  $\mu$ m. D, Expression profile control VICs after 14 days of NT and OST treatment.  $n = 4$  NT,  $n = 4$  OST. Data are shown as means  $\pm$  SD.  $P$  values were calculated by the Mann-Whitney  $U$  test with \*  $P = 0.0286$  in Figure D.

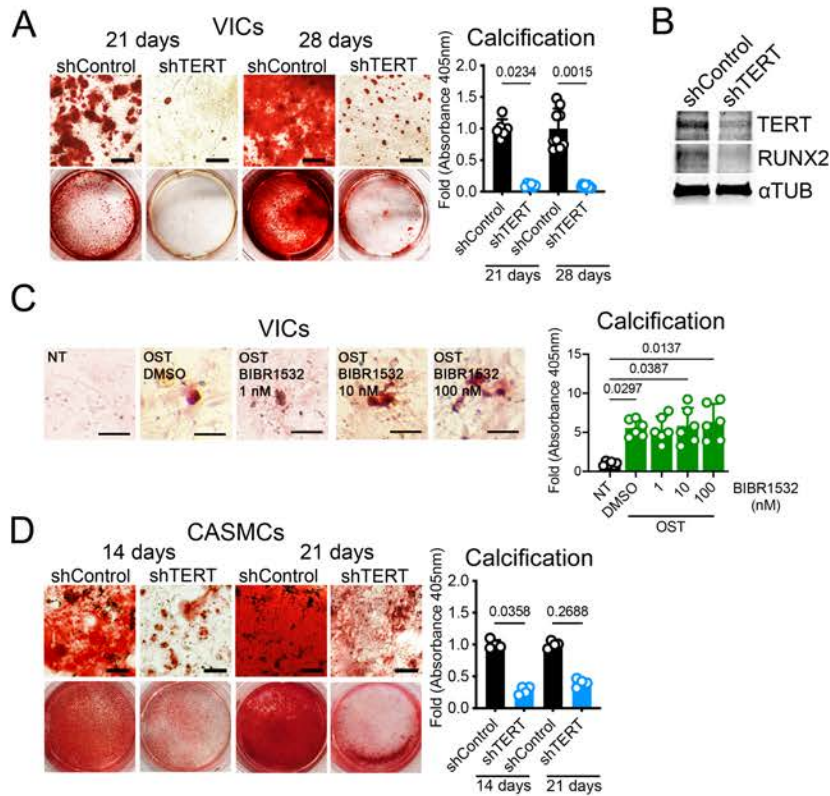

**Figure 4. TERT is required for osteogenic transition and calcification of human cells.**

A, VICs transduced with lentivirus containing either short hairpin scramble (shControl-GFP) or short hairpin TERT (shTERT-GFP) and followed by OST stimulated for up to 28 days. Calcium deposition was visualized by Alizarin Red staining. Quantification of calcification is presented as average absorbance on the right graph.  $n = 6$  shControl,  $n = 6$  shTERT at 21 days and  $n = 9$  shControl,  $n = 9$  shTERT at day 28. Scalebar 400  $\mu$ m. Data are shown as means  $\pm$  SD.

B, Representative western blot staining of VICs transduced with lentivirus containing either shControl-GFP or shTERT-GFP followed by 7 days of osteogenic stimulation.

C, VICs treated with BIBR1532 and stimulated with osteogenic media for 28 days. Scalebar 50  $\mu$ m. Quantification of calcification is shown on the right graph.  $n = 6$ . Data are shown as means  $\pm$  SD.

D, CASMCs transduced with lentivirus containing either shControl-GFP or shTERT-GFP and stimulated with osteogenic media for up to 21 days.  $n = 4$  shControl,  $n = 4$  shTERT for both time points. Scalebar 400  $\mu$ m. Quantification of calcification is shown on right graph.  $P$  values were calculated with the Kruskal-Wallis  $H$  test with Dunn post hoc test and shown on top of each graph.



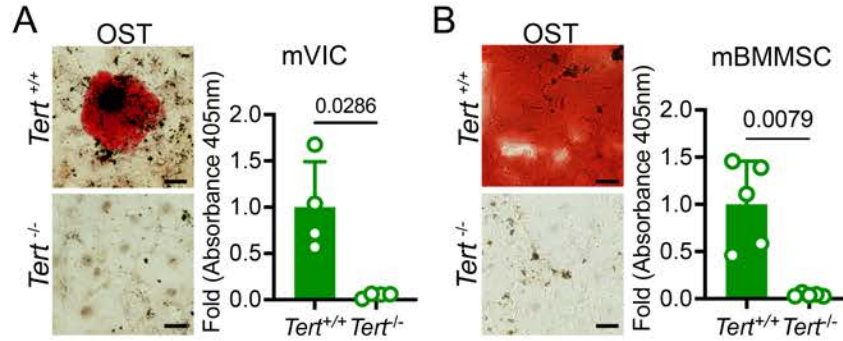

**Figure 5. TERT is required for the osteogenic transition of murine cells.**

A, Representative images of mVICs isolated from wild-type (*Tert*<sup>+/+</sup>) or F1 *Tert* knockout (*Tert*<sup>-/-</sup>) mice and stimulated with osteogenic media for 21 days. Scalebar 100  $\mu$ m. Quantification of calcification is shown on the right graph. B, Representative images of mBMMSCs isolated from *Tert*<sup>+/+</sup> or *Tert*<sup>-/-</sup> mice and stimulated with osteogenic media for 21 days. Scalebar 100  $\mu$ m. Quantification of calcification is presented as average absorbance on the right graphs. All graphs are n = 4 *Tert*<sup>+/+</sup>, n = 4 *Tert*<sup>-/-</sup>. Data are shown as means  $\pm$  SD. P values were calculated by the Mann-Whitney U test and indicated on each graph.

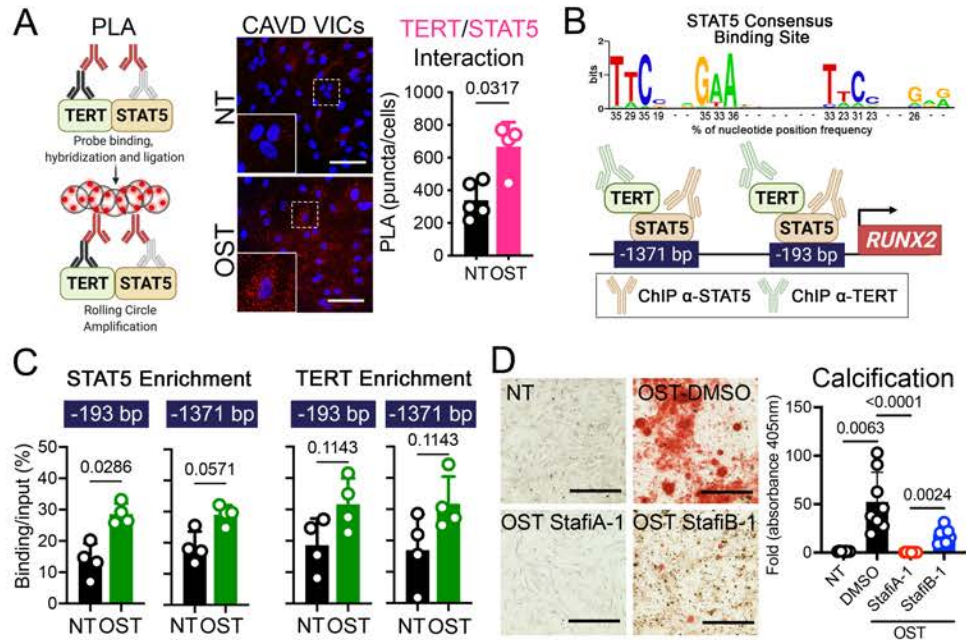

**Figure 6. TERT and STAT5 interact to upregulate RUNX2 expression in human VICs.**

A, Diagram of proximity ligation assay (PLA, left panel). Representative images of TERT/STAT5 complex (red foci) in CAVD VICs cultured for 21 days in osteogenic medium and detected by PLA. Scalebar 100  $\mu$ m (middle panel). Quantification of PLA signal is shown in the right graph.  $n = 4$ . B, Logo analysis depicting the consensus binding site for tetrameric STAT5 (top panel). Diagram depicting STAT5 and TERT binding RUNX2 promoter and the positions of the predicted STAT5 binding sites (bottom panel). C, STAT5 (left graphs) and TERT (right graphs) enrichment on the RUNX2 promoter of control VICs after 14 days of osteogenic stimulation and quantified by ChIP-qPCR.  $n = 4$ . D, Representative images of control and CAVD VICs treated with 10  $\mu$ M of the STAT5 inhibitors StafiA-1 or StafiB-1 during 28 days of osteogenic stimulation. Scalebar 400  $\mu$ m.  $n = 8$ , means  $\pm$  SD. Quantification of calcification is shown on the right graph. Data are shown as means  $\pm$  SD. P values were calculated by the Mann-Whitney U test (Figure A and C) and Kruskal-Wallis H test (Figure D) and indicated on each graph.

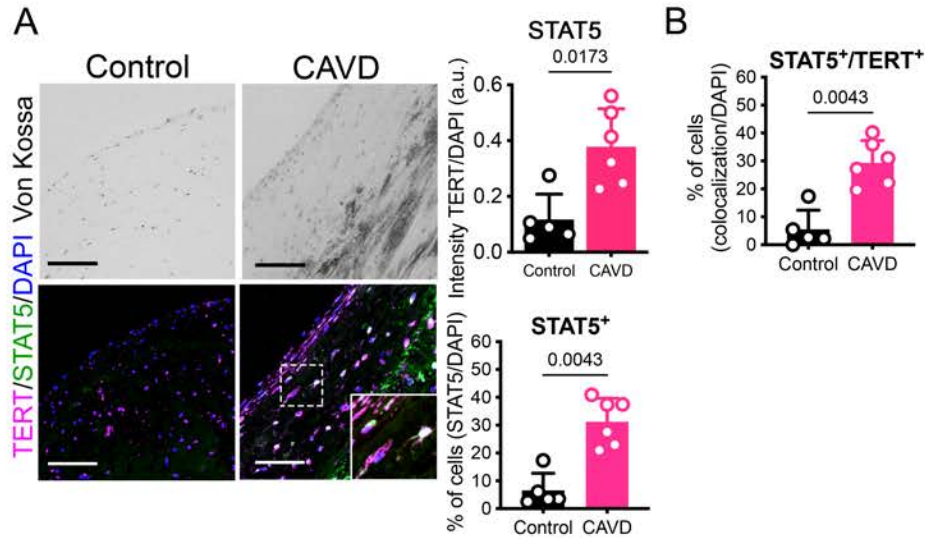

**Figure 7. TERT and STAT5 are upregulated and colocalize in CAVD tissue.**

A, Representative serial sections of Von Kossa (dark precipitation, top panels) and TERT and STAT5 immunofluorescent staining (bottom panels) in control and CAVD valve tissues. Scalebar 100  $\mu$ m. Quantification of STAT5 intensity and STAT5-positive cells (STAT5+) are shown on the right panels. B, Quantification of STAT5-TERT-positive cells. Data are shown as means  $\pm$  SD,  $n = 5$  control,  $n = 6$  CAVD.  $P$  values were calculated with the Mann-Whitney  $U$  test and indicated on each graph.

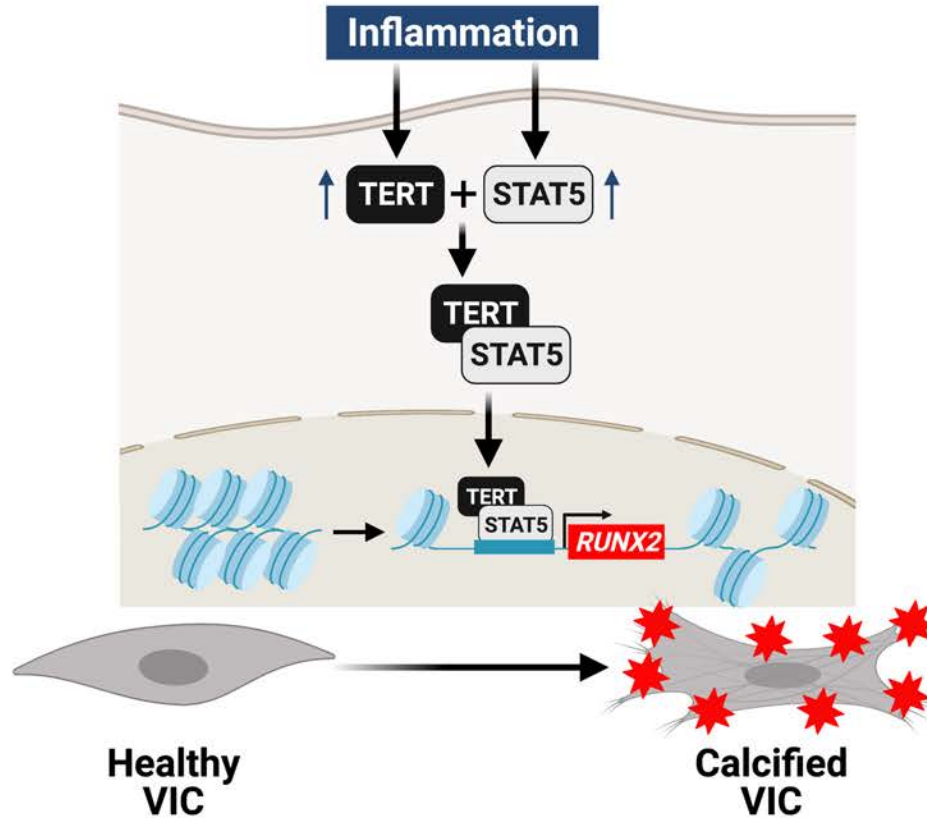

**Figure 8. TERT/STAT5 promotes osteogenic reprogramming**

Inflammation promotes the upregulation and interaction of TERT and STAT5. Then, the TERT/STAT5 complex translocates into the nucleus where TERT facilitates STAT5 binding to the promoter region of *RUNX2* gene, to engage the osteogenic reprogramming of VICs during the early stages of CAVD pathogenesis.



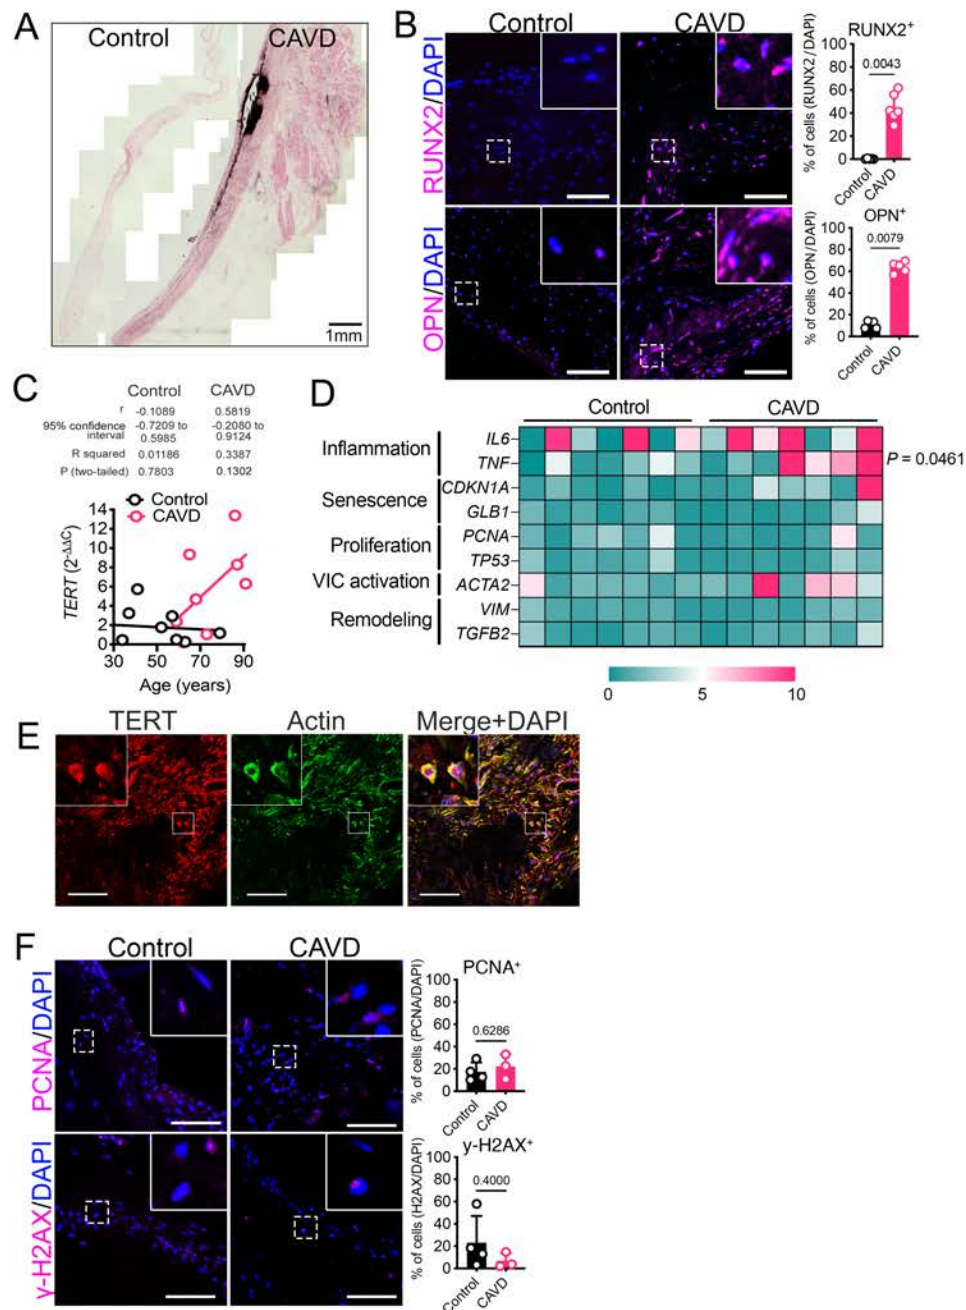

**Supplemental Figure 1. Characterization of human CAVD valves and correlation of TERT expression with age.**

A, Representative section of Von Kossa staining in control and valve CAVD leaflets tissue. Scalebar 1 mm. B, Representative serial sections of RUNX2 immunofluorescent staining (top panels) and OPN (bottom panels) in control and CAVD valve tissues. Scalebar 100  $\mu$ m. Quantification of RUNX2-positive cells and OPN-positive cells on the leaflet specimen is shown on the right graphs. n = 5 control, n = 6 CAVD. C, Correlation between age of the donor and TERT expression. n = 8 control, n = 9 CAVD, Pearson correlation test. D, Expression profile in the subject leaflets. n = 7 control, n = 7 CAVD. E, Confocal images of a CAVD leaflet. Scalebar 50  $\mu$ m. F, Representative images of immunofluorescent staining of PCNA (top panels) and  $\gamma$ -H2AX (bottom panels) in control and CAVD valve tissues. Scalebar 100  $\mu$ m. Quantification of PCNA-positive cells and  $\gamma$ -H2AX-positive cells are shown on the right graphs. n = 4 control, n = 3 CAVD. Data are shown as means  $\pm$  SD. P values were calculated with the Mann-Whitney U test (Figures B, G, and F) and two-way ANOVA with Sidak post hoc test (heatmap on D).

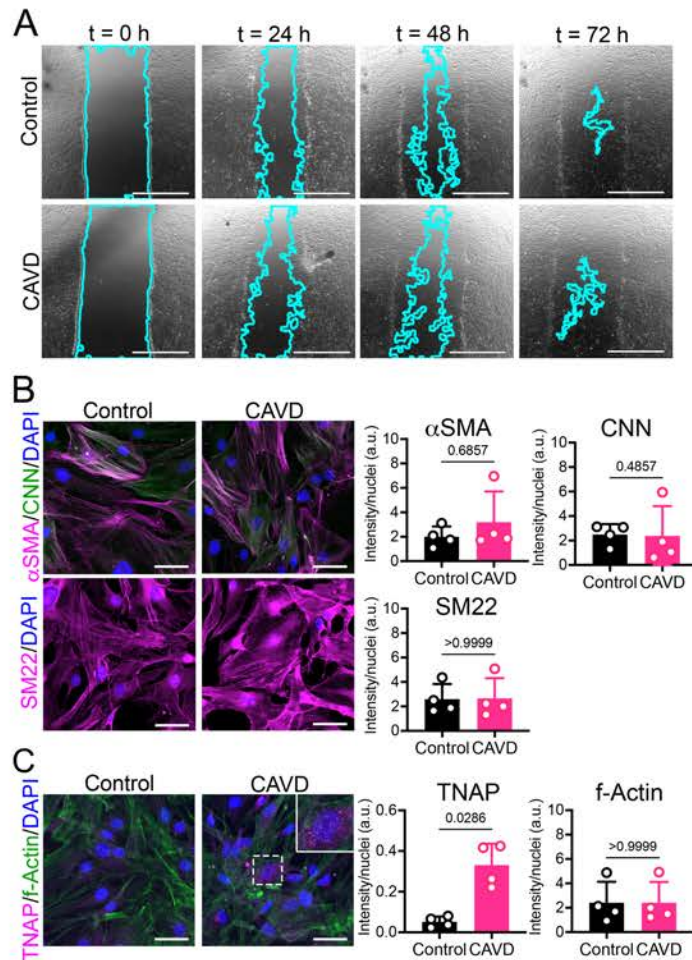

**Supplemental Figure 2. VIC migration, activation, and osteogenic markers at baseline.**

A, Representative images of a scratch assay in control (top panels) and CAVD (bottom panels) VICs. Time points are indicated on top of each panel. Blue lines denote the cell migration front. Scalebar 1 mm. n = 10 control, n = 10 CAVD. B, Representative images of  $\alpha$ SMA and CNN (top panels) and SM22 (bottom panels) in control and CAVD VICs. Scalebar 50  $\mu$ m. Signal quantification of  $\alpha$ SMA, CNN, and SM22 are shown on the right panels. n = 4 control, n = 4 CAVD. C, Representative images of TNAP and f-Actin signal in control and CAVD VICs. Scalebar 50  $\mu$ m. Signal quantification of TNAP and f-Actin is shown on the right panels. n = 4 control, n = 4 CAVD. Data are shown as means  $\pm$  SD. P values were calculated with the Mann-Whitney U test and shown on top of each graph.

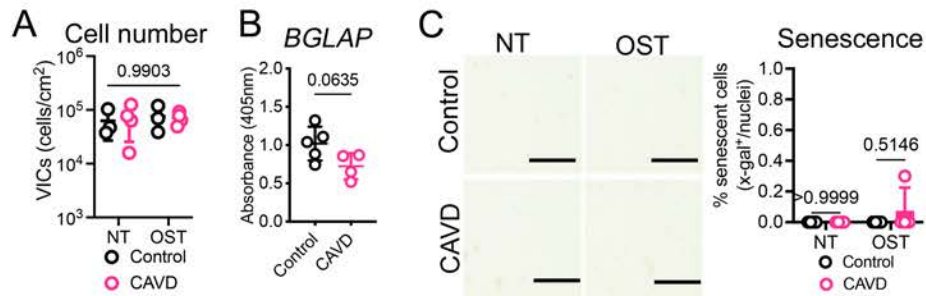

**Supplemental Figure 3. Senescence is not operative during the osteogenic differentiation of VICs.**

A, Cell counting of control and CAVD VICs after 14 days of NT or OST stimulation. n = 4 control, n = 4 CAVD. B,  $\beta$ -galactosidase (*BGLAP*) mRNA transcript quantification in control and CAVD VICs at baseline. n = 5 control, n = 4 CAVD. C, Representative images of senescence-associated  $\beta$ -galactosidase activity staining of VICs after 28 days of NT or OST stimulation. Blue cells were considered positive for senescence. Quantification of senescence is shown on the right graph. n = 4 control; n = 4 CAVD. Data are shown as means  $\pm$  SD. *P* values were calculated with the Mann-Whitney U test (figure A and B) and the Kruskal-Wallis *H* test with Dunn post hoc test and shown on top of each graph.



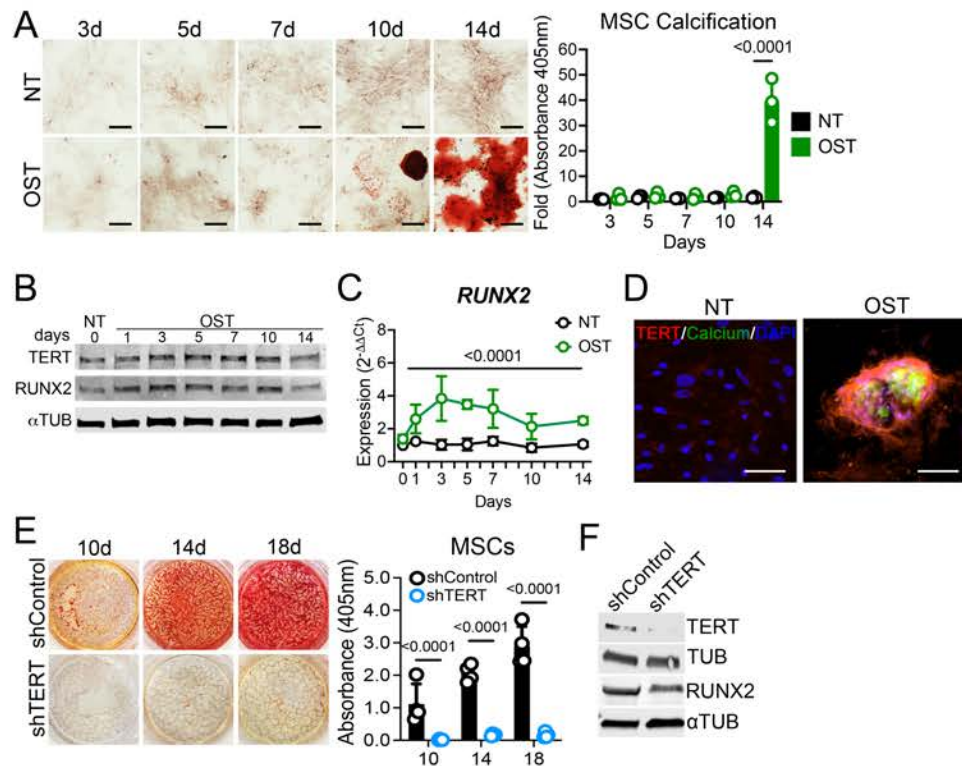

**Supplemental Figure 4. TERT is upregulated and required for the osteogenic differentiation of human mesenchymal stem cells.**

A, Representative images of human MSCs stimulated with OST for 14 days. Calcium deposition was visualized by Alizarin Red staining. Quantification of calcification is shown on the right graph.  $n = 3$ . Scalebar 50  $\mu$ m. B, Western blot staining of samples from MSCs collected during the 14 days of OST treatment. C, TERT and RUNX2 expression profile of differentiating MSCs stimulated for 14 days with OST media.  $n = 3$ . D, Representative TERT immunofluorescent staining images of MSCs stimulated with osteogenic media for 14 days. Scalebar 100  $\mu$ m. E, MSCs transduced with lentivirus containing either shControl-GFP or shTERT-GFP and stimulated with osteogenic media for up to 21 days. Quantification of calcification is shown on the right graph.  $n = 4$ ; means  $\pm$  SD. F, Representative western blot staining of MSCs transduced with lentivirus containing either shControl-GFP or shTERT-GFP followed by 7 days of osteogenic stimulation. Data are shown as means  $\pm$  SD.  $P$  values were calculated by Kruskal-Wallis  $H$  test with Dunn pairwise comparison post hoc test (Figure C) and two-way ANOVA with Tukey post hoc test (Figures A and E).



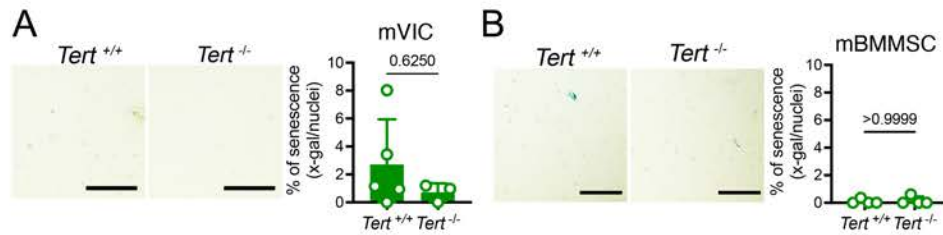

**Supplemental Figure 5. Senescence is not operative in mice *Tert*<sup>-/-</sup> cells.**

A, Representative images of a senescence-associated  $\beta$ -galactosidase (SA- $\beta$ -gal) staining of mVICs isolated from wild-type (*Tert*<sup>+/+</sup>) or F1 *Tert* knockout (*Tert*<sup>-/-</sup>) mice after 21 days of OST stimulation. Blue cells were considered positive for senescence. Quantification of senescence cells is shown on the right graph. B, Representative images of SA- $\beta$ -gal staining of mBMMSCs isolated from *Tert*<sup>+/+</sup> or *Tert*<sup>-/-</sup> mice after 21 days of osteogenic stimulation. Blue cells were considered to be positive for senescence. Quantification of senescence is shown on the right graph. Both figures, n = 5 *Tert*<sup>+/+</sup>, n = 3 *Tert*<sup>-/-</sup>. Scalebar 400  $\mu$ m. Data are shown as means  $\pm$  SD and P were calculated with the Mann-Whitney U test and shown on each graph.

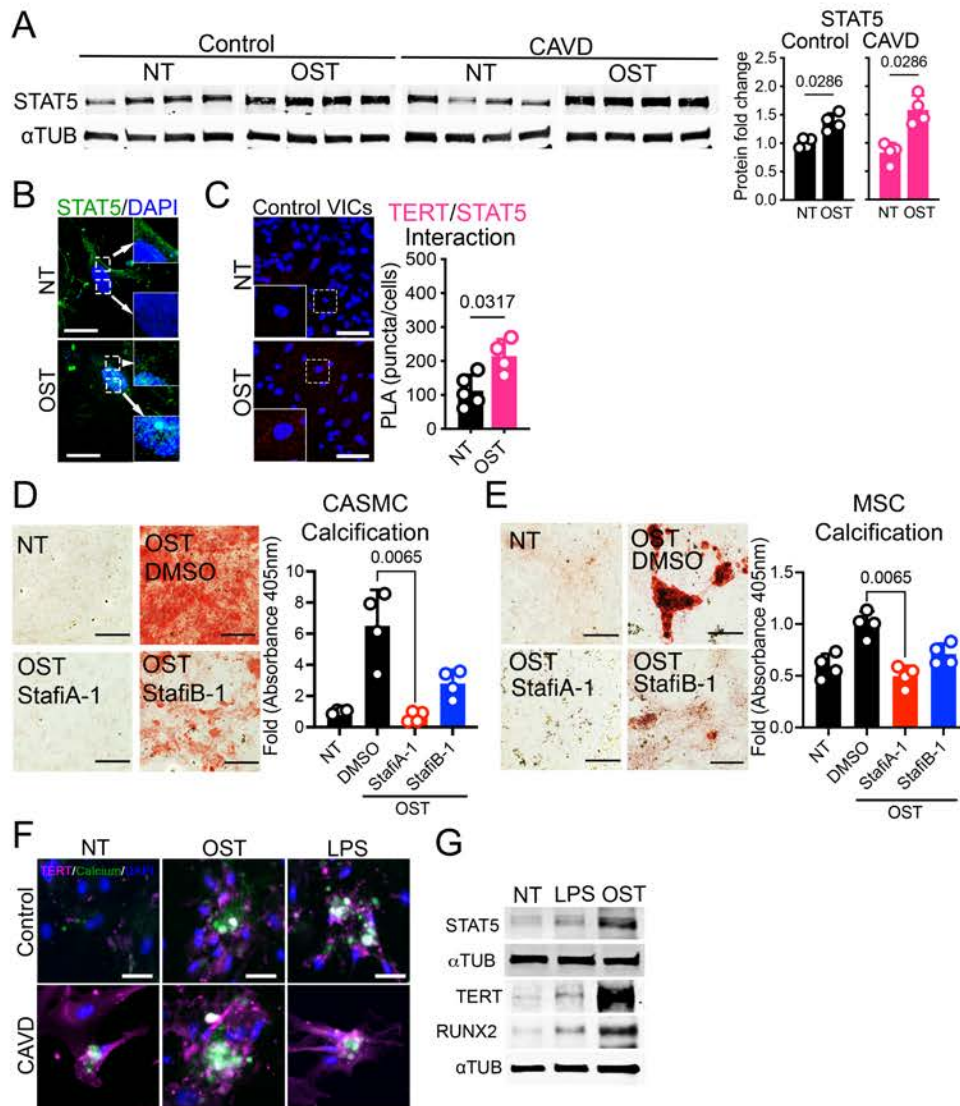

### Supplemental Data Fig 6. STAT5 is upregulated and required during osteogenic differentiation of VICs.

A, Representative western blot staining of samples from CAVD and control VICs after 14 days of OST stimulation. Quantification of protein levels is shown on the right graphs.  $n = 4$ , control  $n = 4$  CAVD. B, Representative immunofluorescence image of STAT5 shows subcellular distribution after 14 days of NT and OST stimulation. Scalebar 40  $\mu$ m. C, Representative images of TERT/STAT5 complex (red foci) in control VICs and detected by proximity ligation assay (PLA). Scalebar 100  $\mu$ m. Quantification of PLA is shown on the right graph.  $n = 4$ . D, Representative images of CASMCs (left panels) treated with 10  $\mu$ M of the STAT5 inhibitors StafiA-1 or StafiB-1 during the 14 days of OST stimulation. Scalebar 400  $\mu$ m. Quantification of calcification is shown on the right graph.  $n = 4$ . E, Representative images of MSCs (left panels) treated with 10  $\mu$ M of the STAT5 inhibitors StafiA-1 or StafiB-1 during the 21 days of OST stimulation. Scalebar 400  $\mu$ m. Quantification of calcification is shown on the right graph.  $n = 4$ . F, Representative immunofluorescence images of VICs after 14 days of LPS treatment or OST stimulation. Scalebar 50  $\mu$ m. G, Representative western blot staining of CAVD VICs after 14 days of OST stimulation. Data are shown as means  $\pm$  SD.  $P$  values were calculated with the Mann-Whitney  $U$  test (Figures A and B) and the Kruskal-Wallis  $H$  test with Dunn pairwise comparison post-test (Figured D and E) and indicated in each graph.

**Table 1: Patient information**

| Patient ID | Age | Sex    | Cause of Death                                                 | Calcification (Von Kossa Staining) | Hypertension | Diabetes    | Smoking | Alcohol |
|------------|-----|--------|----------------------------------------------------------------|------------------------------------|--------------|-------------|---------|---------|
| 2016-037   | 31  | Male   | Brain anoxia due to cardiovascular complications               | No                                 | No           | No          | Unknown | Yes     |
| 2016-038   | 81  | Male   | Myocardial Infarction                                          | No                                 | No           | No          | Unknown | Unknown |
| 2016-042   | 22  | Female | Brain anoxia due to head trauma                                | No                                 | No           | No          | No      | Unknown |
| 2016-045   | 59  | Female | Stroke                                                         | No                                 | PH           | Yes         | Yes     | Unknown |
| 2016-046   | 65  | Male   | Head trauma from accident                                      | No                                 | No           | No          | Unknown | Unknown |
| 2016-048   | 56  | Female | Stroke                                                         | No                                 | HTN          | No          | Unknown | Unknown |
| 2016-050   | 65  | Male   | Stroke                                                         | No                                 | HTN          | No          | Unknown | Yes     |
| 2016-054   | 63  | Female | Hemorrhage and Rupture AAA                                     | No                                 | No           | Yes         | No      | Unknown |
| 2016-065   | 58  | Male   | Stroke                                                         | No                                 | HTN          | Yes         | Yes     | Unknown |
| 2016-073   | 41  | Female | Traumatic arrest and motor vehicle accident                    | No                                 | HTN          | No          | Yes     | Unknown |
| 2016-078   | 34  | Female | Heart Failure                                                  | No                                 | No           | No          | Unknown | Unknown |
| 2016-079   | 59  | Male   | Respiratory failure                                            | No                                 | HTN          | No          | No      | Unknown |
| 2016-083   | 52  | Male   | Stroke                                                         | No                                 | PAH          | No          | Yes     | Unknown |
| 2016-085   | 52  | Male   | Myocardial Infarction                                          | No                                 | PH           | No          | Unknown | Unknown |
| 2016-091   | 59  | Female | Stroke                                                         | No                                 | HTN          | No          | Unknown | Unknown |
| 2016-092   | 47  | Female | Stroke                                                         | No                                 | No           | No          | No      | Unknown |
| 2016-098   | 57  | Male   | Cardiac arrest                                                 | No                                 | HTN          | No          | Yes     | Unknown |
| 2016-101   | 37  | Female | Cardiac Death                                                  | No                                 | No           | No          | Unknown | Unknown |
| 2016-146   | 79  | Male   | Cardiac arrest                                                 | No                                 | No           | No          | Yes     | Unknown |
| 2017-005   | 66  | Female | Stroke                                                         | No                                 | No           | No          | Unknown | Unknown |
| 2017-035   | 48  | Female | Brain anoxia due to CO poisoning                               | No                                 | No           | No          | Unknown | Unknown |
| 2017-051   | 56  | Male   | Brain anoxia due to cardiac arrest                             | No                                 | No           | No          | Unknown | Unknown |
| 2017-069   | 37  | Male   | Motor vehicle accident                                         | No                                 | No           | No          | Unknown | Unknown |
| 03-0127    | 61  | Male   | Surgical replacement due to aortic reconstruction for aneurysm | No                                 | HTN          | No          | Unknown | Unknown |
| 03-0129    | 68  | Male   | Surgical replacement due to aortic reconstruction for aneurysm | No                                 | HTN          | Yes Type II | Unknown | Unknown |
| 2016-034   | 91  | Male   | Natural causes                                                 | Yes                                | No           | No          | No      | Unknown |
| 2016-051   | 65  | Male   | Natural causes                                                 | Yes                                | HTN          | No          | Yes     | Yes     |
| 2016-053   | 73  | Male   | Congestive heart failure                                       | Yes                                | No           | No          | No      | Unknown |

|          |    |        |                             |     |     |                |         |         |
|----------|----|--------|-----------------------------|-----|-----|----------------|---------|---------|
| 2016-060 | 73 | Male   | Cardiac arrest              | Yes | No  | No             | Unknown | Unknown |
| 2016-061 | 67 | Male   | Natural causes              | Yes | No  | Yes            | Unknown | Unknown |
| 2016-062 | 59 | Male   | Cardiac arrest              | Yes | No  | No             | Yes     | Unknown |
| 2016-068 | 68 | Female | Intracranial hemorrhage     | Yes | No  | No             | Yes     | Unknown |
| 2016-072 | 62 | Female | Cardiac arrest              | Yes | No  | No             | No      | Unknown |
| 2016-093 | 43 | Male   | Cardiac arrest              | Yes | HTN | Yes            | No      | Unknown |
| 2016-095 | 87 | Male   | Myocardial Infarction       | Yes | HTN | No             | Yes     | Unknown |
| 2016-102 | 58 | Female | Cardiac arrest and asystole | Yes | No  | No             | Yes     | Unknown |
| 2016-103 | 72 | Male   | Cardiac arrest              | Yes | HTN | No             | Unknown | Unknown |
| 2016-105 | 86 | Male   | Cardiac arrest              | Yes | No  | No             | No      | Unknown |
| 2016-118 | 62 | Male   | Cardiac arrest              | Yes | No  | No             | No      | Unknown |
| 2017-025 | 57 | Female | Brain anoxia due to choking | Yes | No  | Yes<br>Type II | Unknown | Unknown |
| 2017-076 | 68 | Female | Myocardial Infarction       | Yes | No  | No             | No      | Unknown |

HTN = Hypertension PH = Pulmonary Hypertension PAH = Pulmonary Arterial Hypertension

**Table 2: Patient Summary**

| Summary   | total | age | % male | % hypertension | % CVD death | % deceased |
|-----------|-------|-----|--------|----------------|-------------|------------|
| control   | 25    | 54  | 52%    | 48%            | 68%         | 100%%      |
| calcified | 16    | 68  | 81%    | 25%            | 81%         | 100%       |

### Supplemental Table 1: TRANSFAC STAT5 Binding Sites on RUNX2 promoter

| Transcription Factor  | Position | Core score | Matrix score | Sequence                |
|-----------------------|----------|------------|--------------|-------------------------|
| STAT5A (homodimer)    | -4571    | 1          | 0.948        | ctTTTCCaagaaagc         |
| STAT5B (homodimer)    | -4571    | 0.968      | 0.954        | ctttccaAGAAgC           |
| STAT5B:STAT5A         | -4570    | 1          | 0.999        | ttTTCCAagaa             |
| STAT5A                | -4570    | 1          | 0.994        | tttccAAGAAag            |
| STAT5A                | -4568    | 1          | 1            | TTCCAagaaa              |
| STAT5A (homotetramer) | -4568    | 0.996      | 0.846        | ttccaAGAAgctaatacaaaa   |
| STAT5A                | -3801    | 1          | 1            | tAGAAAtg                |
| STAT5A                | -3035    | 1          | 1            | tAGAAAtg                |
| STAT5A (homotetramer) | -2843    | 0.996      | 0.866        | taccaacaactttTTTCTtgaa  |
| STAT5A (homotetramer) | -2828    | 0.977      | 0.899        | ttctTGAAAttgattcaagatc  |
| STAT5A (homotetramer) | -2875    | 0.977      | 0.873        | gggttgtaagatgTTTCAGtgaa |
| STAT5A (homotetramer) | -1371    | 0.788      | 0.834        | taaatggcaaaaaATGCCtagaa |
| STAT5A (homotetramer) | -193     | 0.995      | 0.882        | tgccaGGAAAggcctaccacaag |

**Supplementary Table 2: Primers**

| Species | Gene      | Forward Primer Sequence 5' -> 3' | Reverse Primer Sequence 5' -> 3' | Techniq | Source        |
|---------|-----------|----------------------------------|----------------------------------|---------|---------------|
| Human   | TERT      | GCATTGGAATCAGACAGCAC             | CCACGACGTAGTCCATGTTC             | qPCR    | Sigma-Aldrich |
| Human   | RUNX2     | ATTCCTGTAGATCCGAGCACC            | GCTCACGTCGCTCATTITTC             | qPCR    | IDT           |
| Human   | MSX2      | GAGCTGGGATGTGGTAAAGG             | AAATTCAGAAGATGGAGCGG             | qPCR    | IDT           |
| Human   | CDKN1A    | TGTCCGTCAGAACCCATG               | AAAGTCGAAGTTCATCGCTC             | qPCR    | IDT           |
| Human   | PCNA      | ACACTAAGGGCCGAAGATAAC            | ACAGCATCTCCAATATGGCTGA           | qPCR    | IDT           |
| Human   | TP53      | GAGGTTGGCTCTGACTGTACC            | TCCGTCCCAGTAGATTACCAC            | qPCR    | IDT           |
| Human   | ALPL      | ATGGGATGGGTGTCTCCACA             | CCACGAAGGGGAACCTTGTG             | qPCR    | IDT           |
| Human   | GLB1      | TATACTGGCTGGCTAGATCACTG          | GGCAAAATTTGGTCCCACCTATAA         | qPCR    | IDT           |
| Human   | STAT3     | CAGCAGCTTGACACACGGTA             | GCCCAATCTTGACTCTCAATCC           | qPCR    | IDT           |
| Human   | STAT5A    | ATGTGAAACCACAGATCAAG             | TCTGTGGGTACATGTTATAGG            | qPCR    | Sigma-Aldrich |
| Human   | STAT5B    | ATGGGACTCAGTAGATCTTG             | CTTCAGTAAAAACCCATCTTCC           | qPCR    | Sigma-Aldrich |
| Human   | TGFb2     | CTGCATCTGGTCACGGTCCG             | CCTCGGGCTCAGGATAGTCT             | qPCR    | IDT           |
| Human   | OSX       | CCCCCTTTACAAGCACTAATGG           | GGCAGACAGTCAGAAGAGCTG            | qPCR    | IDT           |
| Human   | ACTA2     | AAAAGACAGCTACGTGGGTGA            | GCCATGTTCTATCGGGTACTTC           | qPCR    | IDT           |
| Human   | FOXO1     | TCGTCATAATCTGTCCCTACACA          | CGGTTTCGGCTCTTAGCAAA             | qPCR    | Sigma-Aldrich |
| Human   | 18s       | GTAACCCGTTGAACCCCAT              | CCATCCAATCGGTAGTAGCG             | qPCR    | IDT           |
| Human   | MYH11     | CGCCAAGAGACTCGTCTGG              | TCTTTCCCAACCGTGACCTTC            | qPCR    | IDT           |
| Human   | IL6       | AAATTCGGTACATCCTCGACGG           | GGAAGTTCAGGTTGTTTTCTGC           | qPCR    | IDT           |
| Human   | VIM       | GGAAACTAATCTGGATCACTC            | CATCTCTAGTTTTCAACCGTC            | qPCR    | Sigma-Aldrich |
| Human   | SOX9      | GCCAGGTGCTCAAAGGCTA              | TCTCGTTCCAGAAGTCTCCAGAG          | qPCR    | IDT           |
| Human   | KLF4      | CCCACATGAAGCGACTTCCC             | CAGGTCCAGGAGATCGTTGAA            | qPCR    | IDT           |
| Human   | SM22      | AGTGCAGTCCAAAATCGAGAAG           | CTTGCTCAGAATCACGCCAT             | qPCR    | IDT           |
| Human   | TNF       | CCTCTCTCTAATCAGCCCTCTG           | GAGGACCTGGGAGTAGATGAG            | qPCR    | IDT           |
| Human   | BGLAP     | GGACTGTGACGAGTTGGCTG             | CCGTAGAAGCGCCGATAGG              | qPCR    | IDT           |
| Human   | SMTN      | CAAAAAGTCCTAACCCCTGCT            | TCATGTCTGTCACCTCCAC              | qPCR    | IDT           |
| Human   | BMP2      | ACCCGCTGTCTTCTAGCGT              | TAAATTGAAGAAGAAGCGCC             | qPCR    | Sigma-Aldrich |
| Human   | THBS1     | TGCTCCAATGCCACAGTTCC             | CTGCTGAATTCCATTGCCACA            | qPCR    | IDT           |
| Human   | CNN1      | GTCAACCCAAAATTGGCACCA            | ACCTTGTTTCTTTCTGCTTCCG           | qPCR    | IDT           |
| Human   | MMP13     | CACCAATTCCTGGGAAGTCT             | GCAGCTGTTCACTTTGAGGA             | qPCR    | IDT           |
| Human   | GAPDH     | CTGGGCTACACTGAGCACC              | AAGTGGTCGTTGAGGGCAATG            | qPCR    | IDT           |
| Human   | pRUNX2-1  | ACCTTACAGGAGTTTGGGCT             | CTTTCCTGGCATCCAGAAGGATA          | ChIP    | IDT           |
| Human   | pRUNX2-2  | CCGCCCACCCCATTTACTT              | GGCGAACAGACCAATTTTCTAGG          | ChIP    | IDT           |
| Human   | hTelomere | GGTTTTTGAGGGTGAGGGTGAGGGT        | TCCCRACTATCCCTATCCCTATCCCT       | PCR     | Sigma-Aldrich |
